# Supplementary material for: An aphid RNA transcript migrates systemically within plants and is a virulence factor
Source: PubMed Central journal article supplement — Proc Natl Acad Sci U S A. 2020 May 27;117(23):12763–71. doi: 10.1073/pnas.1918410117 (PMC7293609; doi:10.1073/pnas.1918410117), 2020-05-27
Supplement: pnas.1918410117.sapp.pdf [file pnas.1918410117.sapp.pdf]

1  
2  
3  
4  
5  
6  
7  
8  
9  
10  
11  
12  
13  
14  
15  
16  
17  
18  
19  
20  
21  
22  
23  
24  
25  
26  
27  
28  
29

**Supplementary Information for**

**An aphid RNA transcript migrates systemically within plants and is a virulence factor**

Yazhou Chen<sup>1</sup>§, Archana Singh<sup>2</sup>§, Gemy G. Kaithakottil<sup>2</sup>, Thomas C. Mathers<sup>1</sup>, Matteo Gravino<sup>1</sup>, Sam T. Mugford<sup>1</sup>, Cock van Oosterhout<sup>3</sup>, David Swarbreck<sup>2</sup> and Saskia A. Hogenhout<sup>1</sup>\*

<sup>1</sup>Crop Genetics, John Innes Centre, Norwich Research Park, Norwich, NR4 7UH, UK; <sup>2</sup>Earlham Institute, and <sup>3</sup>School of Environmental Sciences, University of East Anglia, Norwich Research Park, Norwich, NR4 7UH, UK.

§Y.C and A.S. contributed equally to the work.

\*To whom correspondence may be addressed:

Saskia A. Hogenhout, Department of Crop Genetics, John Innes Centre, Norwich Research Park, Norwich NR4 7UH, United Kingdom

Email: [saskia.hogenhout@jic.ac.uk](mailto:saskia.hogenhout@jic.ac.uk)

ORCID: 0000-0003-1371-5606

**This PDF file includes:**

- Supplementary file S1
- Figures S1 to S19
- Tables S1 to S3
- SI References

**Other supplementary materials for this manuscript include the following:**

- Datasets S1-S5

## 1 **Supplementary Methods**

### 3 **Plants and growth conditions**

4 Seeds of *B. rapa*, *A. thaliana*, *N. benthamiana* were provided by John Innes  
5 Centre horticultural department. *Solanum tuberosum* (Desiree) were purchased  
6 from Marks & Spencer (Norwich, UK). Seeds of *C. indicum* (polar star), *H. annuus*  
7 (Helios X Helios Flame), *P. vulgaris* (NYFB) were purchased from Thompson  
8 Morgan (Ipswich, UK). Seeds of *P. sativum* (JI3253) were provided by Claire  
9 Domoney (John Innes Centre, UK). Seeds of *Z. mays* (Early sunglow corn) were  
10 provided by Ian Bedford (John Innes Centre, UK). Seeds were directly sown into  
11 soil (peat-based compost). Plants were grown in a controlled environmental room  
12 at a constant temperature of 22°C and 70% humidity under a 10 h day /14 h night  
13 cycle.

### 15 ***M. persicae* transfer to 9 plant species**

16 A colony of *M. persicae* clone O that started from a single female was  
17 established on *B. rapa* in a growth chamber (14 h light, 10 h dark at constant 20  
18 °C, 75% humidity) in 2010. From this founder colony on *B. rapa*, approximately  
19 500 asexual individuals were transferred to each of 9 plant species, including *B.*  
20 *rapa* (used as reference) and *A. thaliana*, as a representative of another plant  
21 species of the family Brassicaceae, and plant species belonging to 4 additional  
22 plant families, including *N. benthamiana* and *S. tuberosum* (Solanaceae), *C.*  
23 *indicum* and *H. annuus* (Asteraceae), *P. sativum* and *P. vulgaris* (*C. indicum* and  
24 *H. annuus*), and the monocot maize (*Z. mays*) (Poaceae). The aphids were  
25 maintained for about 4 generations on these plants, except for *C. indicum* and *P.*  
26 *vulgaris*, on which the aphids were reared for 10 generations. Aphid colonies on  
27 all 9 plant species were maintained in the same growth chamber (14 h light, 10 h  
28 dark at constant 20 °C, 75% humidity).

29 Stable aphid populations on the 9 hosts were analyzed for development time  
30 in days between births and emergence of adults, longevities in days between births  
31 to deaths, weights in mg per adult and reproduction rates measured by numbers

1 of nymphs divided by the number of adults on days 7, 9 and 11 for colonies on *B.*  
2 *rapa*, *A. thaliana*, *N. benthamiana* and *S. tuberosum* and on days 7, 9, 11, 13, 15,  
3 17 and 18 for colonies on *C. indicum*, *H. annuus*, *P. sativum*, *P. vulgaris* and *Z.*  
4 *mays*.

## 6 **Transcriptome sequencing of *M. persicae* on 9 hosts**

7 Approximately 100 aphids were harvested from each plant species, at 5  
8 independent biological replicates per plant species, and snap frozen in liquid  
9 nitrogen. Aphid samples were ground to powder using 5 mm stainless steel beads  
10 (Qiagen, Germany) and a TissueLyser II (Qiagen, Germany), and RNA was  
11 extracted using Trizol reagent (Sigma, UK) and the Qiagen RNeasy MinElute  
12 Cleanup Kit (Qiagen, Germany), which included and on-column DNase digestion.

## 14 **RNA sequencing and transcriptome assembly**

15 Strand-specific libraries were constructed from mRNAs isolated from 1 ug  
16 of total aphid RNA using the poly-A method of the Illumina TruSeq RNA Library  
17 Preparation kit (Illumina, US) following the manufacturer's procedures. cDNA was  
18 synthesized by 10 cycles of PCR to amplify the fragments. Libraries were then  
19 pooled and sequenced on a HiSeq 2000 generating 150-bp paired-end sequences  
20 (Earlham Institute, Norwich, UK). A genome-guided transcriptome assembly was  
21 generated with RNA-seq data of the 45 libraries of the nine host experiments, five  
22 replicates each (data generated herein as described above) and RNA-seq data  
23 generated from library LIB1777 (1), as follows. Reads were trimmed for low quality  
24 and adapter using Trim Galore! v0.4.0 with default settings (2). Trimmed reads  
25 were aligned to *M. persicae* reference genome G006 v1 (1) by HISat2 version-  
26 2.0.5 (3). The RNA-seq reads of all 46 libraries were merged together in one BAM  
27 file (Binary version of Sequence Alignment/Map) using Samtools (v0.1.18) (4) and  
28 assembled to create transcript models by StringTie version-1.3.3 (5) guided by the  
29 reference genome (6). A consensus assembly was produced using StringTie  
30 merge. Transcripts with Fragments Per Kilobase of transcript per Million (FPKM) ≤  
31 0.2 were removed from downstream analyses. Details of all transcriptomic libraries

1 generated for this study are listed in ([SI Appendix, Table S1](#)). GFF files of the  
2 transcriptome assembly were submitted to GEO (GSE129667,  
3 Transcriptome\_Assembly\_G006\_V2.gff).

#### 4 5 **Functional annotation and *M. persicae* lncRNAs identification**

6 The computational workflow for the lncRNAs identification of the *M.*  
7 *persicae* is shown in [SI Appendix, Fig. S2A](#). lncRNA identification was performed  
8 on transcript models obtained from the transcriptome assembly described above.  
9 Mikado compare (7) was used to identify and subsequently exclude transcripts  
10 overlap over 10% of the length of annotated miRNA, tRNA, rRNA and transposons  
11 features. To identify putative Open Reading Frame (ORFs), we used  
12 TransDecoder (<https://transdecoder.github.io>) with the default parameters. To  
13 further maximize the sensitivity, we scanned all ORFs for homology to curated  
14 protein sequence (Arthropods) in the Swiss-Prot database (8), downloaded  
15 November 20, 2018 from <http://www.uniprot.org/downloads>. This was done by  
16 BlastP (v2.7.1, evaluate 1e-5). HAMMER (v-3.0) was run against the Pfam database  
17 (9) with default parameter to search for protein domains. The coding potentials of  
18 the remaining transcripts were assessed using CPC2 (10) and those with a coding  
19 potential score < 0.5 were selected. To consider transcript as a candidate  
20 lncRNA, transcript must be larger than 200nt, not have a hit in the SwissProt,  
21 Pfam database, considered non-coding by the CPC2, and not be already  
22 classified as another class of functional RNA (rRNA, miRNA, tRNA,  
23 transposons). The candidate lncRNA were submitted as a separate gff file  
24 (GSE129667, Candidate\_lncRNA.gff).

25 Functional annotation for the protein coding genes were generated using  
26 annotF v1.02 (<https://github.com/EI-CoreBioinformatics/AnnotF>) and was  
27 submitted to GEO (GSE129667, Functional\_annotation.txt.gz). Assessments of  
28 whether *M. persicae* genes are expressed in the salivary glands and guts was  
29 done by performing blastn against the EST datasets of Ramsey et al., 2007 (28).

#### 30 31 **Differential gene expression analysis**

1 Differentially expressed transcripts of *M. persicae* colonies on the 9-plant  
2 species was determined by comparing transcript expression levels of *M.*  
3 *persicae* colonies on *B. rapa* (original host) with those of colonies on the 8 other  
4 plant species (new hosts) (see experimental design in Fig. 1A) using the  
5 DESeq2 package in R (v1.2.10) (12) and transcript count per million (TPM)  
6 generated by Kallisto v0.42.3 (<https://pachterlab.github.io/kallisto/>) (SI Dataset  
7 S1). Additional filtering was employed in DESeq2 to remove lowly expressed  
8 transcripts (mean count < 10) on the basis of normalized counts. Transcripts  
9 were considered differentially expressed if they had a *p* value less than 0.05 after  
10 accounting for a 5% FDR according to the Benjamini-Hochberg procedure and if  
11 log2Fold change was greater than 1.

### 12 13 **Co-expression analysis**

14 Weighted gene co-expression network analysis (WGCNA) was used to  
15 generate unsigned co-expression networks on nine host swap data (13). Genes  
16 with normalized count (TPM) > 5 in at least one sample per plant host were used  
17 for the co-expression analysis and clustered into network modules using the  
18 topological overlap measure (TOM). Genes were grouped by hierarchical  
19 clustering on the basis of dissimilarity of gene connectivity (1-TOM). The co-  
20 expression clusters were produced by cutreeDynamic in which the minimum size  
21 of modules was kept at 20 genes. The modules were randomly colour-labelled.  
22 An adjacency matrix was built by applying a power function ( $\beta$ ) on the Pearson  
23 correlation matrix. A  $\beta$  value of 18 was found to be optimal for balancing the scale-  
24 free property of the co-expression network and the sparsity of connections  
25 between genes.

### 26 27 **Manual annotation of *Ya* genes**

28 A 148 bp nucleotide sequence (SI Appendix, Fig. S8) that includes the  
29 entire exon 2 of the *Ya* genes and that was found to be conserved among 23  
30 lncRNA genes in the darkslateblue module was used to search the *M. persicae*  
31 reference genome G006 with Blastn (v2.22) using default parameters. Blast hits,

1 with coverage more than 80 percent were converted to GFF and loaded to the  
2 Apollo browser (11) along with the annotated gene models (22) and all assembled  
3 transcripts herein before the merging step (see above). Gene models and  
4 corresponding transcripts that aligned to the 148-bp nucleotide sequence were  
5 selected and further curated by manually annotating the 3' ends of each of the  
6 transcripts based on the presence of a poly-A tail. The 5' ends were identified  
7 based on the most conserved sequence among all transcripts combined with  
8 existing RT-PCR data for *Ya1* (SI Appendix, Fig. S12). The curated annotation of  
9 the *Ya* family enabled more accurate transcript quantifications among its members.  
10 We updated the gene models in our previous gff file for the *Ya* locus and submitted  
11 as a separate file (GSE129667, Manual\_Anno.V3.gff). In addition to *M. persicae*,  
12 we also did manual annotation of *Ya* genes in five other aphid species including *A.*  
13 *pisum*, *M. cerasi*, *A. glycines*, *R. padi* and *D. noxia* using publicly available RNA-  
14 seq data and genome assemblies (SI Dataset S5) and was submitted to GEO  
15 (GSE129667).

16

### 17 **Identification *M. persicae* RNAs in plants**

18 To assess if aphid translocate transcripts into plants, twenty adult *M. persicae*  
19 were caged on rosette leaves of 4-week-old *A. thaliana* plants for 24 hrs. The  
20 caged leaf area with aphids was assigned 'aphid feeding site'. Leaves on plants  
21 caged with empty cages were included as controls. Leaf areas covered by the  
22 cages were carefully washed three times with deionized water and three time with  
23 nuclease-free water. RNAs were isolated from four independent biological  
24 replicates of aphid-exposed leaves and non-exposed control leaves and  
25 processed for RNA-seq library synthesis and sequenced on the Illumina HiSeq  
26 25000 (Novogene, Beijing, China). Reads were trimmed to remove sequencing  
27 adapters and aligned to *A. thaliana* genome (TAIR10 database,  
28 <http://arabidopsis.org>) and the *M. persicae* G006 genome (22) with HISAT2 v2.0.5.  
29 Reads mapped to the *M. persicae* genome were retrieved and subjected to further  
30 filtering by mapping them back to the *A. thaliana* genome. Reads that did not align  
31 to the *A. thaliana* genome in the last step were considered as unique *M. persicae*

1 mapping reads. Transcripts with TPM  $\geq$  50 in at least one sample and that were  
2 present in at least three samples were selected for further analysis.

#### 3 4 **RT-PCR analyses to detect systemic migration of aphid transcripts in plants**

5 Systemic migration of aphid transcripts was determined by caging a leaf  
6 section with aphids and detection of aphid transcripts in the caged area (feeding  
7 site), next to the caged area of the same leaf (near-feeding site) and a distal leaf  
8 (distal site). See experimental setups shown in [Fig. 4A](#) and [SI Appendix, Fig.  
9 S14](#). Plants exposed to cages without aphids were used as controls. For *A.*  
10 *thaliana* plants, aphids were caged at the distal halves of the 8<sup>th</sup> rosette leaf (14)  
11 of 4-week-old *A. thaliana* plants for 24 hrs. The proximal leaf area of the 8<sup>th</sup> leaf  
12 next to the cage near the petiole was assigned near-feeding site and the 5<sup>th</sup> leaf  
13 that is likely phloem-connected with the 8<sup>th</sup> leaf (14) of *A. thaliana* plants the distal  
14 site. Similar setup as for *A. thaliana* were used for *B. rapa*, *P. sativum* and maize  
15 plants, except that for maize the near-feeding site was the middle of the leaf next  
16 to the caged area and distal site the part of this leaf near the stem ([SI Appendix,  
17 Fig. S14](#)). Upon the 24 hr period of exposure to the cages with or without aphids,  
18 sections of leaves that were caged were immediately separated from the non-  
19 caged parts with scissors and the cages and aphids removed. Then the remaining  
20 parts of the leaves and distal leaves were detached from the plants. Leaf sections  
21 detached from plants were cleaned with the brush to remove aphids and visible  
22 debris. The leaf tissues were submerged in 5 mL of MilliQ water in a 15 mL tube.  
23 The tube was shaken for 30 sec after which the MilliQ water was removed. This  
24 was repeated two more times with MilliQ water and three additional times with  
25 nuclease-free water. Samples were snap-frozen in liquid nitrogen and storage at -  
26 80 °C.

27 Total RNAs were isolated from the leaf tissues by RNeasy Plant Mini Kit  
28 (Qiagen, Germany) followed by a DNase treatment with RNase-free DNase I  
29 (Thermo Fisher Scientific, US). cDNA was synthesized from 1  $\mu$ g total RNA at 20  
30  $\mu$ L reaction volume with poly(A) primers using the RevertAid First Strand cDNA  
31 Synthesis Kit (Thermo Fisher Scientific, US). The qRT-PCRs reactions were

1 performed on a CFX96 Touch™ Real-Time PCR Detection System using  
2 transcript-specific primers (*SI Appendix, Table S3*). Each reaction was performed  
3 in a 20 µL reaction volume containing 10 µL SYBR Green (Maxima SYBR  
4 Green/ROX qPCR Master Mix, Thermo Fisher Scientific, USA), 0.4 µL Rox  
5 Reference Dye II, 1 µL of each primer (10 µM), 1 µL of 20 µL sample cDNA, and  
6 7.6 µL UltraPure Distilled water (Invitrogen, US). The PCR cycles were: 95 °C for  
7 10 s, 40 cycles at 95 °C for 20 s, 63 °C for 30 s. The identities of PCR products  
8 were verified by Sanger sequencing.

9 To compare *Ya1* transcript concentrations in the feeding and distal sites, a  
10 standard *Ya1* concentration curve was generated (*SI Appendix, Fig. S13*). For  
11 this, the 273-nt *Ya1* fragment cloned into the plasmid pBI121 under promoter 35S  
12 was used as the PCR template. The concentration curve was generated with a  
13 serial of dilution of the plasmid pBI121\_35S::*Ya1* from the highest concentration  
14  $1.44\text{E}^{-10}$  g/ µL to the lowest concentration  $1.44\text{E}^{-18}$  g/ µL and primers (*Ya1* primer6  
15 and *Ya1* primer9, *SI Appendix, Table S3*) using PCR conditions as described  
16 above.

### 17 18 **Primer design for amplification of *M. persicae* *Ya* transcripts**

19 Primers to specifically amplify *M. persicae* *Ya* transcripts were designed with  
20 the PrimerQuest Tool (Integrated DNA Technologies, IA, USA) that predicted five  
21 to ten primers for each of the *Ya* transcripts. The primer pairs were aligned to the  
22 sequences of all *Ya* transcripts and the ones that matched unique sequences of  
23 one *Ya* transcript selected (*SI Appendix, Table S3*). *Ya* transcripts for which no  
24 unique primers were available were excluded from further analyses.

### 25 26 **Detection of aphid transcripts by northern blotting**

27 For northern blot analyses, 1 µg of total plant and aphid RNA were separated  
28 on a 6% denaturing polyacrylamide gel (PAGE) with 1 X TBE buffer (10 X TBE  
29 buffer stock, Thermo Fisher Scientific, USA) at 100 V for 60 min. The 273-nt *Ya1*  
30 fragment was cloned with a SP6 sequence at the 3' end of *Ya1* and used to  
31 synthesize a 291-nt *Ya1-SP6* RNA of which 100 ng was ran alongside the total



1 RNAs from aphids and plants on polyacrylamide gels. RNAs were transferred to a  
2 nylon membrane (Hybond N, Amersham, UK) by electroblotting at 0.8 A for 2 hrs  
3 (BIO-RAD, USA) using 0.5 X TBE buffer at 60 V for 60 min. RNAs were cross-  
4 linked to the membranes by a UV cross linker (UVP Inc., CA, USA) using auto-  
5 crosslink function, twice on the side of the blot exposed to the gel and one time on  
6 the other side of the blot.

7 *Ya1* transcript in aphids were detected via hybridization of the northern blots  
8 to a biotin-labelled anti-sense sequence of *Ya1*. Biotin-labelled anti-sense probe  
9 of *Ya1* was synthesized from anti-sense sequences of *Ya1* with the MAXIscript™  
10 SP6/T7 Transcription Kit (Thermo Fisher Scientific, USA) and Biotin-16-dUTP  
11 (Roche, USA). The northern blots were performed according to the manufacturing  
12 manual of North2South Chemiluminescent Hybridization and Detection Kit  
13 (Thermo Fisher Scientific, US). Briefly, the blot was washed in North2South  
14 Hybridization Stringency Wash Buffer at room temperature for one time 20 min, in  
15 Wash Buffer containing 2X SSC/0.1% SDS at room temperature for three times 20  
16 min, and Stringency Wash Buffer at 65 °C for one time 20 min. The washing was  
17 done in 0.2 ml per cm<sup>2</sup> of blot. The blot was then incubated in the Substrate  
18 Working Solution containing equal volumes of the Luminol/Enhancer Solution and  
19 Stable Peroxide Solution for 5 min. To visualize the hybridization signal, the  
20 membrane was exposed to an X-ray film for an appropriate exposure time.  
21 Prestain RNA markers, DynaMarker Prestain Marker for RNA High (catalog  
22 number DM260, BioDynamics Laboratory Inc. Japan) and DynaMarker® Prestain  
23 Marker for Small RNA Plus (catalog number DM253, BioDynamics Laboratory Inc.  
24 Japan) were used to estimate the size of RNAs.

25 *Ya1* transcript in plants were detected via hybridization of the northern blots  
26 to a 273-nt *Ya1* fragment that was labeled using 3000 Ci/mmol of [ $\alpha$ -<sup>32</sup>P] dATP  
27 (PerkinElmer Life Sciences. USA) with the Klenow DNA polymerase reaction as  
28 per manufacturer's instruction (Megaprime DNA Labeling System, GE  
29 Healthcare). The radioactively-labelled PCR probe was denatured at 95°C for 5  
30 min, transferred to ice and then incubated with the blot in 50 ml Hybridization buffer  
31 (Sigma-Aldrich) at 42°C for overnight. Washing was done three times at 42°C with

1 washing buffer (2X SSC/0.1% SDS). The membranes were exposed to storage  
2 Phosphor Screens (GE Healthcare) and hybridization signals were visualized  
3 using Typhoon Trio (GE Healthcare) scanner.

#### 4 5 **Sequencing of 3' ends of aphid *Ya1* transcript**

6 Total RNA was extracted from *M. persicae* aphids reared on *B. rapa* and 3  
7 ug of aphid total RNAs was added to a 80 µL ligation mixture containing 8 µL T4  
8 RNA ligase buffer and 4 µL T4 RNA ligase (Thermo Fisher Scientific, USA), 8 µL  
9 ATP (Invitrogen, USA), 8 µL BSA (Invitrogen, USA), and 10 pmol 3' RACE RNA  
10 adaptor ([SI Appendix, Table S3](#)). RNA ligation was carried out at 16 °C overnight.  
11 The ligated RNA was converted into cDNA using oligo sequences complementary  
12 to the 3' RACE adaptor with RevertAid First Strand cDNA Synthesis Kit (Thermo  
13 Fisher Scientific, USA) ([SI Appendix, Table S3](#)). RACE PCRs were performed  
14 with the *Ya1* forward primer GGACAAGTCCAATCTGC and the adapter primer  
15 CAAGCAGAAGACGGCATAACGA ([SI Appendix, Table S3](#)) in a 50 µL reaction  
16 volume containing 0.5 µL Phusion DNA polymerase (NEB), 10 µL 5X Phusion HF  
17 buffer, 1 µL 10 mM dNTPs, 1 µL of each primer (10 µM), 1 µL of cDNA sample.  
18 The cycle programs were: 98 °C for 30 s, 35 cycles at 98 °C for 10 s, 60 °C for 30  
19 s, 72 °C for 15 s, final extension 72 °C 10 mins. PCR products were separated by  
20 3% agarose gel. DNA bands were visualized under UV light, then cut to extract  
21 DNA using QIAquick Gel Extraction Kit (Qiagen, Germany). DNA was ligated to  
22 pGEM-T (Promega, USA) and Sanger sequenced with M13 primer.

#### 23 24 **Plasmid construction**

25 To generate pJawohl8-RNAi constructs, a 273 bp of *Ya1* was amplified from  
26 *M. persicae* cDNA by PCR with specific primers containing additional attB1 and  
27 attB2 linkers ([SI Appendix, Table S3](#)) for cloning with the Gateway system  
28 (Invitrogen, USA). The 273-bp *Ya1* fragment was introduced into pDONR207  
29 (Invitrogen, USA) plasmid using Gateway BP reaction and transformed into DH5α  
30 competent cells (Invitrogen, USA). Subsequent clones were sequenced to verify  
31 correct size and sequence of inserts. Via the Gateway LB reaction, inserts were

1 transferred from pDONR207 into the plant transformation vector, pJawohl8-RNAi  
2 (kindly provided by I.E. Somssich, Max Planck Institute for Plant Breeding  
3 Research, Germany), which is a plasmid that enables the expression of the  
4 transgene as a double-stranded hairpin transcript, generating plasmid pJawohl8-  
5 RNAi\_Ya1.

6 Plasmids pBI121\_35S::Ya1 and pBI121\_35S::Ya1\_3TAG that produced *Ya1*  
7 and *Ya1\_3UAG* transcripts were constructed as follows. The fragment  
8 corresponding to the 273 nt *Ya1* transcript was amplified from *M. persicae* cDNA  
9 by PCR with specific primers containing *Bam*HI and *Sac*I restriction sites in the  
10 forward and reverse primers, specifically ([SI Appendix, Table S3](#)). The *Bam*HI  
11 and *Sac*I digested PCR fragments were introduced into pBI121 to generate  
12 pBI121\_35S::Ya1. Plasmid pBI121\_35S::Ya1 was used in overlap PCR reactions  
13 (15) to generate the *Ya1\_3TAG* construct in which the three ATGs at positions 41,  
14 62, and 146 of *Ya1* were converted into TAG stop codons. This involved the  
15 amplification of fragments 1, 2, 3 and 4 with primer pairs MutateF and ATG41\_R,  
16 ATG41\_F and ATG62\_R, ATG62\_F and ATG146\_R and ATG146\_F and  
17 MutateR, respectively (see [SI Appendix, Table S3 for primer sequences](#)), and  
18 subsequent amplification of a 81 bp fragment from fragments 1 and 2 with primers  
19 MutateF and ATG62\_R, a 230 bp fragment from fragments 3 and 4 with primers  
20 ATG62\_F and MutateR, and finally the amplification of the 273 nt *Ya1* mutant in  
21 which three ATGs were mutated to three TAGs by combining the 81 bp and 230  
22 bp fragments and primers MutateF and MutateR. The resulting *Ya1\_3TAGs* PCR  
23 fragment was digested with *Bam*HI and *Sac*I and introduced into pBI121 to  
24 generate pBI121\_35S::Ya1\_3TAG.

25 The sequences of plasmid inserts were verified by Sanger sequencing using  
26 specific primers ([SI Appendix, Table S3](#)).

27

## 28 **Generation of transgenic *A. thaliana* plants**

29 pJawohl8-RNAi\_Ya1, pBI121\_35S::Ya1, and pBI121\_35S::Ya1\_3TAG  
30 plasmids were introduced into *A. tumefaciens* strain GV3101 that carried the  
31 helper plasmid pMP90RK for subsequent transformation of *A. thaliana* Col-0 using

1 the floral dip method (16). Transgenic seeds were selected on Murashige and  
2 Skoog (MS) medium supplemented with 20 µg/mL phosphinothricin (BASTA) to  
3 select dsRNA\_Ya1 transformants or on MS containing 50 µg/mL kanamycin to  
4 selection of 35S::Ya1 and 35S::Ya1\_3TAG transformants. F2 seeds were  
5 germinated on MS medium supplemented with 20 µg/mL BASTA or 50 µg/mL  
6 kanamycin for selection. F2 seedlings with 3:1 alive/dead segregation (evidence  
7 of single insertion) were taken forward to the F3 stage. Seeds from F3 plants were  
8 sown on MS with BASTA (for dsRNA\_Ya1 plants) or on MS with kanamycin (for  
9 35S::Ya1 and 35S::Ya1\_3TAG) and lines with 100% survival ratio (homozygous)  
10 were selected.

11

### 12 **Knock down of aphid transcripts by plant-mediated RNA interference (RNAi)**

13 Seeds of the dsRNA\_Ya1 homozygous lines (expressing dsRNA  
14 corresponding to *Ya1*) were sown on MS medium and, after one week, seedlings  
15 were transferred to single pots (8 cm diameter) and transferred to a controlled  
16 environmental growth room at temperature 24 °C day/20 °C night under 10 hours  
17 of light. One *M. persicae* adult was confined to single 4-weeks-old Arabidopsis  
18 lines in sealed experimental cages (15.5 cm diameter and 30 cm height) containing  
19 the entire plant. One day later, the adult was removed, five nymphs remained on  
20 the plants and become adults in five days. Adults were harvested for qRT-PCR to  
21 confirm *Ya1* silencing compared to adults on dsGFP plants.

22 For qRT-PCRs, total RNA was isolated from aphids using Trizol reagent  
23 (Sigma) and subsequent DNase treatment using an RNase-free DNase I (Thermo  
24 Fisher Scientific, US). cDNA was synthesized from 1 µg total RNA with RevertAid  
25 First Strand cDNA Synthesis Kit (Thermo Fisher Scientific, US). The qRT-PCRs  
26 reactions were performed on CFX96 Touch™ Real-Time PCR Detection System  
27 using gene-specific primers. Each reaction was performed in a 20 µL reaction  
28 volume containing 10 µL SYBR Green (Thermo Fisher Scientific, US), 0.4 µL Rox  
29 Reference Dye II, 1 µL of each primer (10 µM), 1 µL of sample cDNA, and 7.6 µL  
30 UltraPure Distilled water (Invitrogen, US). The cycle programs were: 95 °C for 10  
31 s, 40 cycles at 95 °C for 20 s, 60 °C for 30 s. Relative quantification was calculated

1 using the comparative  $2^{-\Delta Ct}$  method (17). All data were normalized to the level of  
2 elongation factor gene (MYZPE13164\_G006\_v1.0\_000087220) from the same  
3 sample.

4

#### 5 ***M. persicae* fecundity assay**

6 Seeds of Arabidopsis lines were sown on MS medium and, after one week,  
7 seedlings were transferred to single pots (8 cm diameter) and transferred to a  
8 controlled environmental growth room at temperature 24 °C day/20 °C night under  
9 10 hours of light. One *M. persicae* adult was confined to single 4-weeks-old  
10 Arabidopsis lines in sealed experimental cages that contained the entire plant. One  
11 day later, the adult was removed, and one nymph remained on the plants.  
12 Offspring produced on the 7<sup>th</sup>, 9<sup>th</sup>, 11<sup>th</sup> day of the experiment were scored and  
13 removed. This experiment was repeated three times to create data from three  
14 independent biological replicates with four to six plants per line per replicate.

15

#### 16 **Statistical analyses**

17 All the data analyses were performed in R (v3.5.2). All statistical tests are  
18 described in the figure legends.

19

1 **Supplementary Figures and Tables**

2

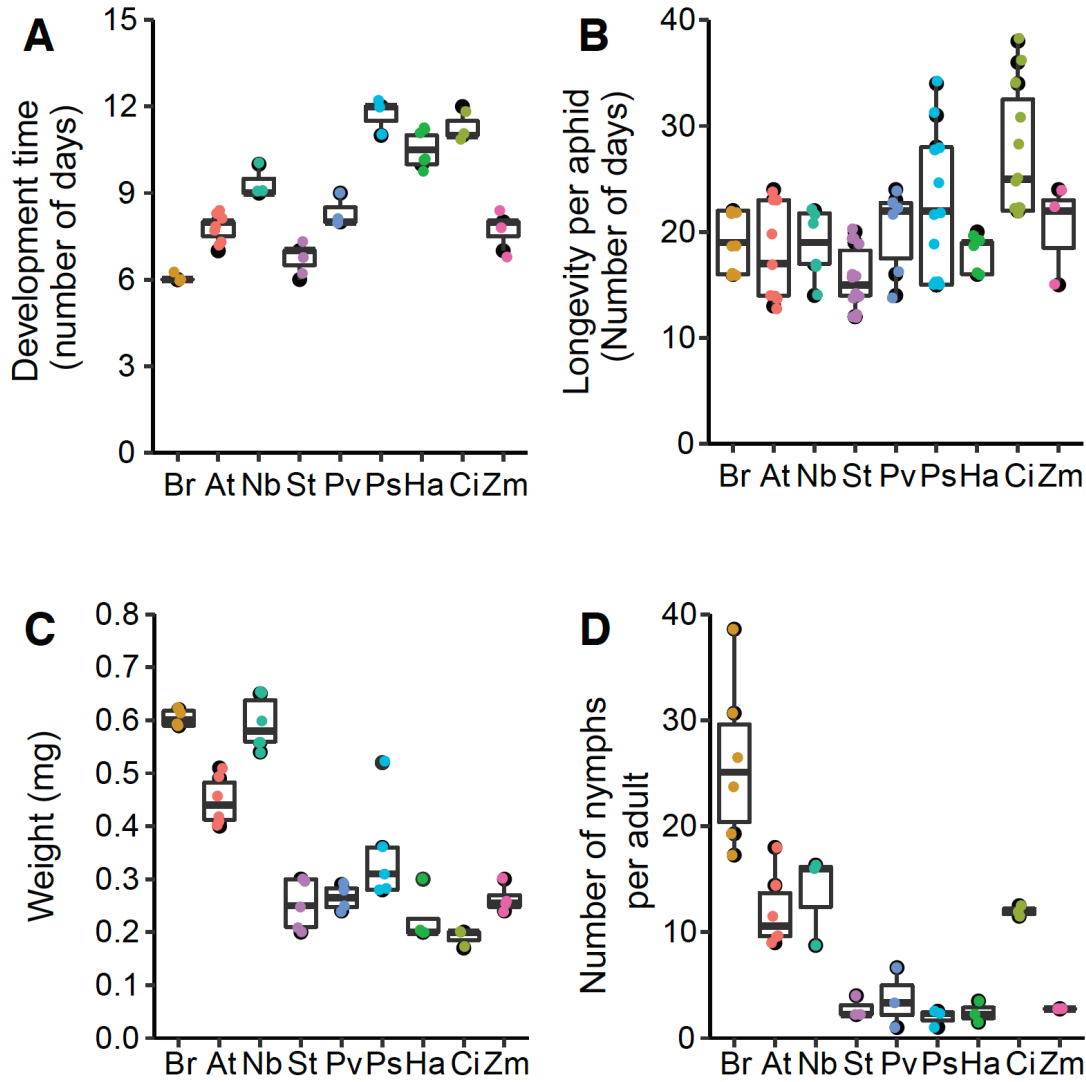

3

4 **Fig. S1.** Performance parameters of stable colonies of *M. persicae* clone O on 9  
 5 divergent plant species. Colonies on *B. rapa* (Br), *A. thaliana* (At), *N.*

6 *benthamiana* (Nb), *S. tuberosum* (St), *C. indicum* (Ci), *H. annuus* (Ha), *P.*

7 *sativum* (Ps), *P. vulgaris* (Pv) and *Zea mays* (Zm), established as shown in Fig.

8 **1A**, were analysed for development time (A) in days between birth and

9 emergence of adults (n = 3-7 plants with one aphid each), longevity (B) in days

10 between birth to death (n = 3-15 plants with one aphid each), weight (C) in mg

11 per adult (n = 3-6 plants with 100 adult aphids each), and number of nymphs per

1 adult (D) calculated by dividing the number of nymphs by the number of adults on  
2 days 7, 9 and 11 (Br, At, Nb and St) or days 7, 9, 11, 13, 15, 17 and 18 (Ci, Ha,  
3 Ps, Pv and Zm) (n = 3-6 plants seeded with one aphid.

4

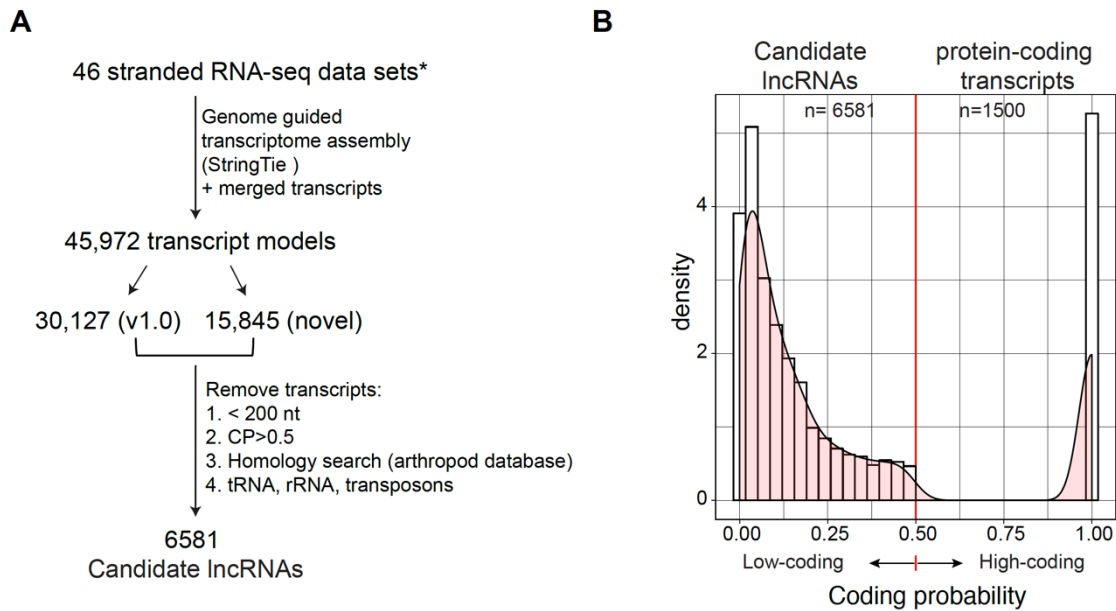

1  
2 **Fig. S2.** Annotation of *M. persicae* transcript models and candidate lncRNAs. (A)  
3 Transcript annotation pipeline. RNA-seq reads from 45 libraries generated from *M.*  
4 *persicae* on nine divergent hosts (data generated herein, [SI Appendix, Fig. S1A](#))  
5 and LIB1771 derived from a *M. persicae* colony on *B. rapa* (1) were assembled  
6 into transcripts using a genome-guided approach with StringTie (5). Of the 45,972  
7 transcripts in total, 30,127 were annotated previously (1) and 15 845 are novel.  
8 The 6 581 transcripts that are candidate lncRNAs were identified upon removing  
9 transcripts of < 200 nt in size, transcripts with coding potential (CP) >0.5, as  
10 determined using the Coding Potential Calculator 2 (CPC2,  
11 <http://cpc2.cbi.pku.edu.cn/>) (10), and that have similarities of deduced protein  
12 sequences to known arthropods proteins, house-keeping RNAs (rRNA and tRNA)  
13 and transposons. (B) Distribution of CPC2 coding probability scores of 6,581  
14 candidate lncRNAs identified in Fig. S2A and 1,500 randomly selected transcripts  
15 from *M. persicae* protein-coding sequences.  
16



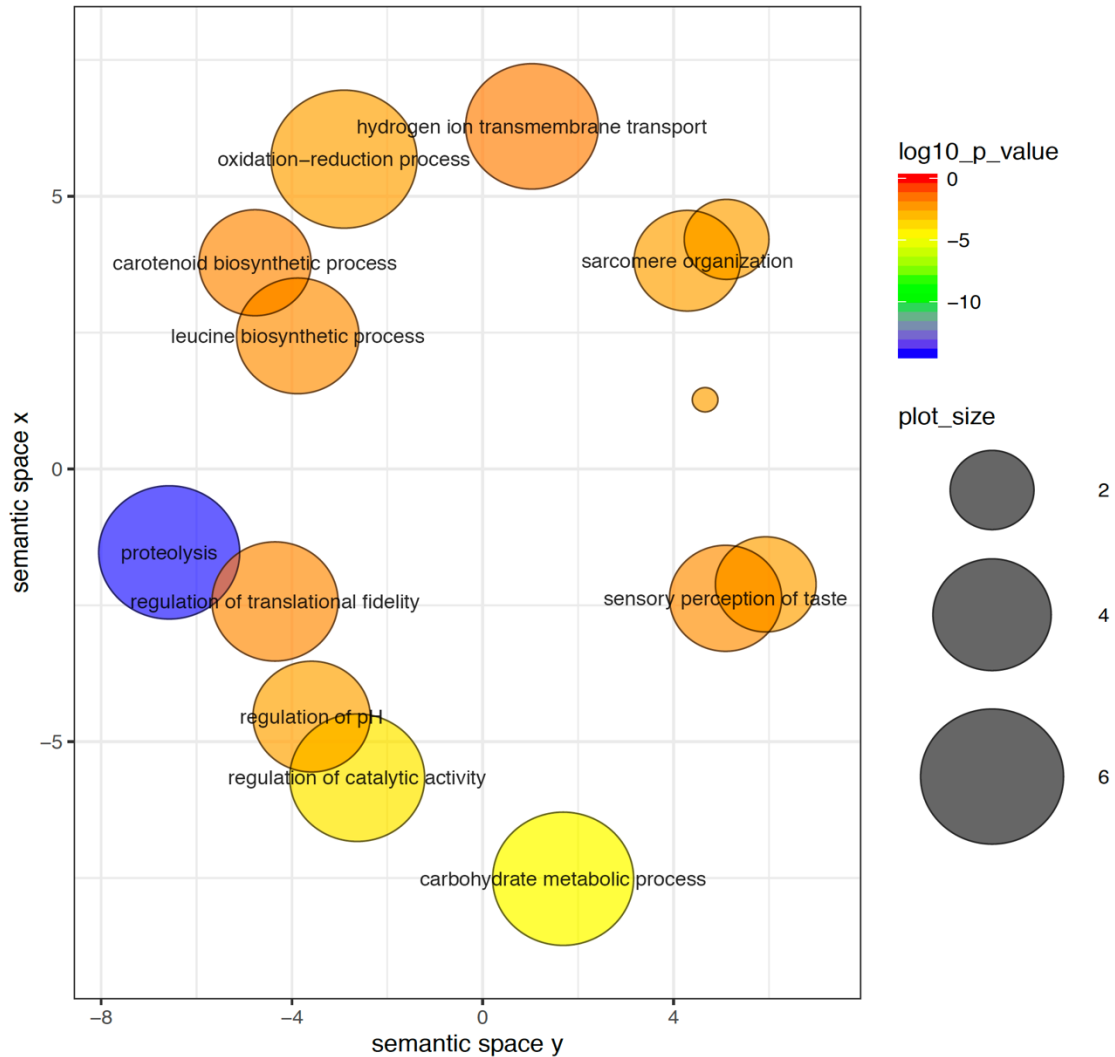

1  
2 **Fig. S3.** Biological process GO terms that are enriched among DE genes of *M.*  
3 *persicae* on 9 plants species. Graphs was generated from data shown in **Fig. 1B**.  
4 Enriched GO terms are represented by circles and are clustered according to  
5 semantic similarities to other GO terms in the gene ontology. Distance between  
6 the circles indicates the semantic similarity between the corresponding GO terms.  
7 Circle size is proportional to the frequency of the GO term, whereas colour  
8 indicates the  $\log_{10}(p\text{ value})$  for the enrichment calculated using GO-seq (red  
9 higher, blue lower). Only GO-terms having  $p$  value and  $\text{padj} < 0.05$  are shown.  
10 Data were summarized and visualized by REVIGO online tool (<http://revigo.irb.hr/>)  
11 (18).  
12

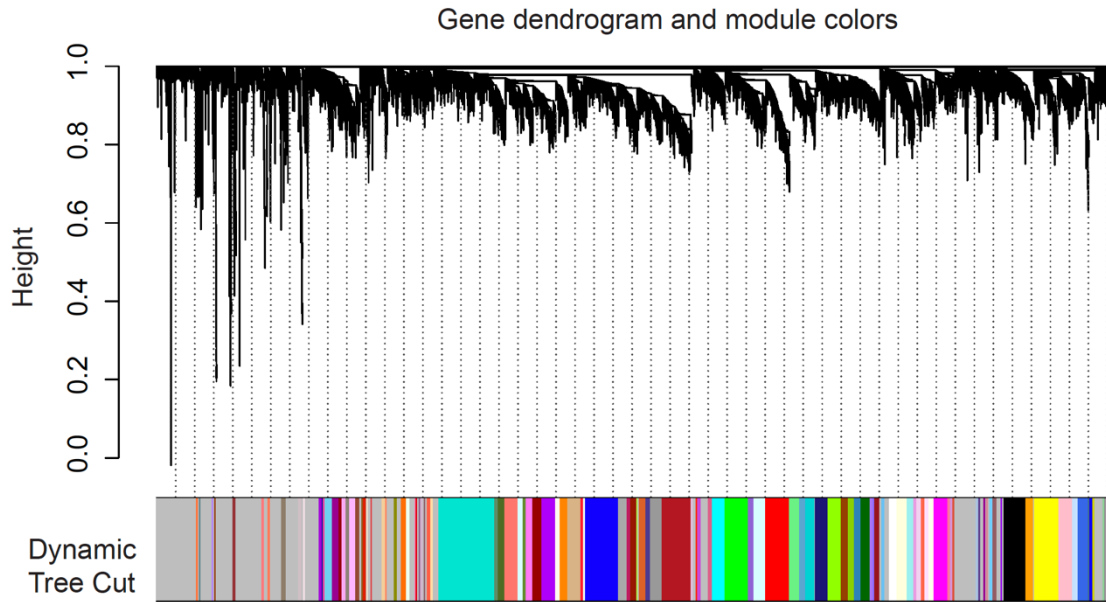

1

2 **Fig. S4.** WGCNA gene co-expression modules of *M. persicae* on 9 plant species.

3 The dendrogram groups 11,824 *M. persicae* genes into 77 distinct modules (color-

4 coded) using hierarchical clustering. Dynamic cut tree was used to identify

5 modules, dividing modules at significant branch points in the dendrogram. The x-

6 axis shows the width of each module that is defined by the number of genes. The

7 y-axis corresponds to distance determined by the extent of topological overlap (1-

8 TOM). Genes not assigned to a module are labelled in grey.

9

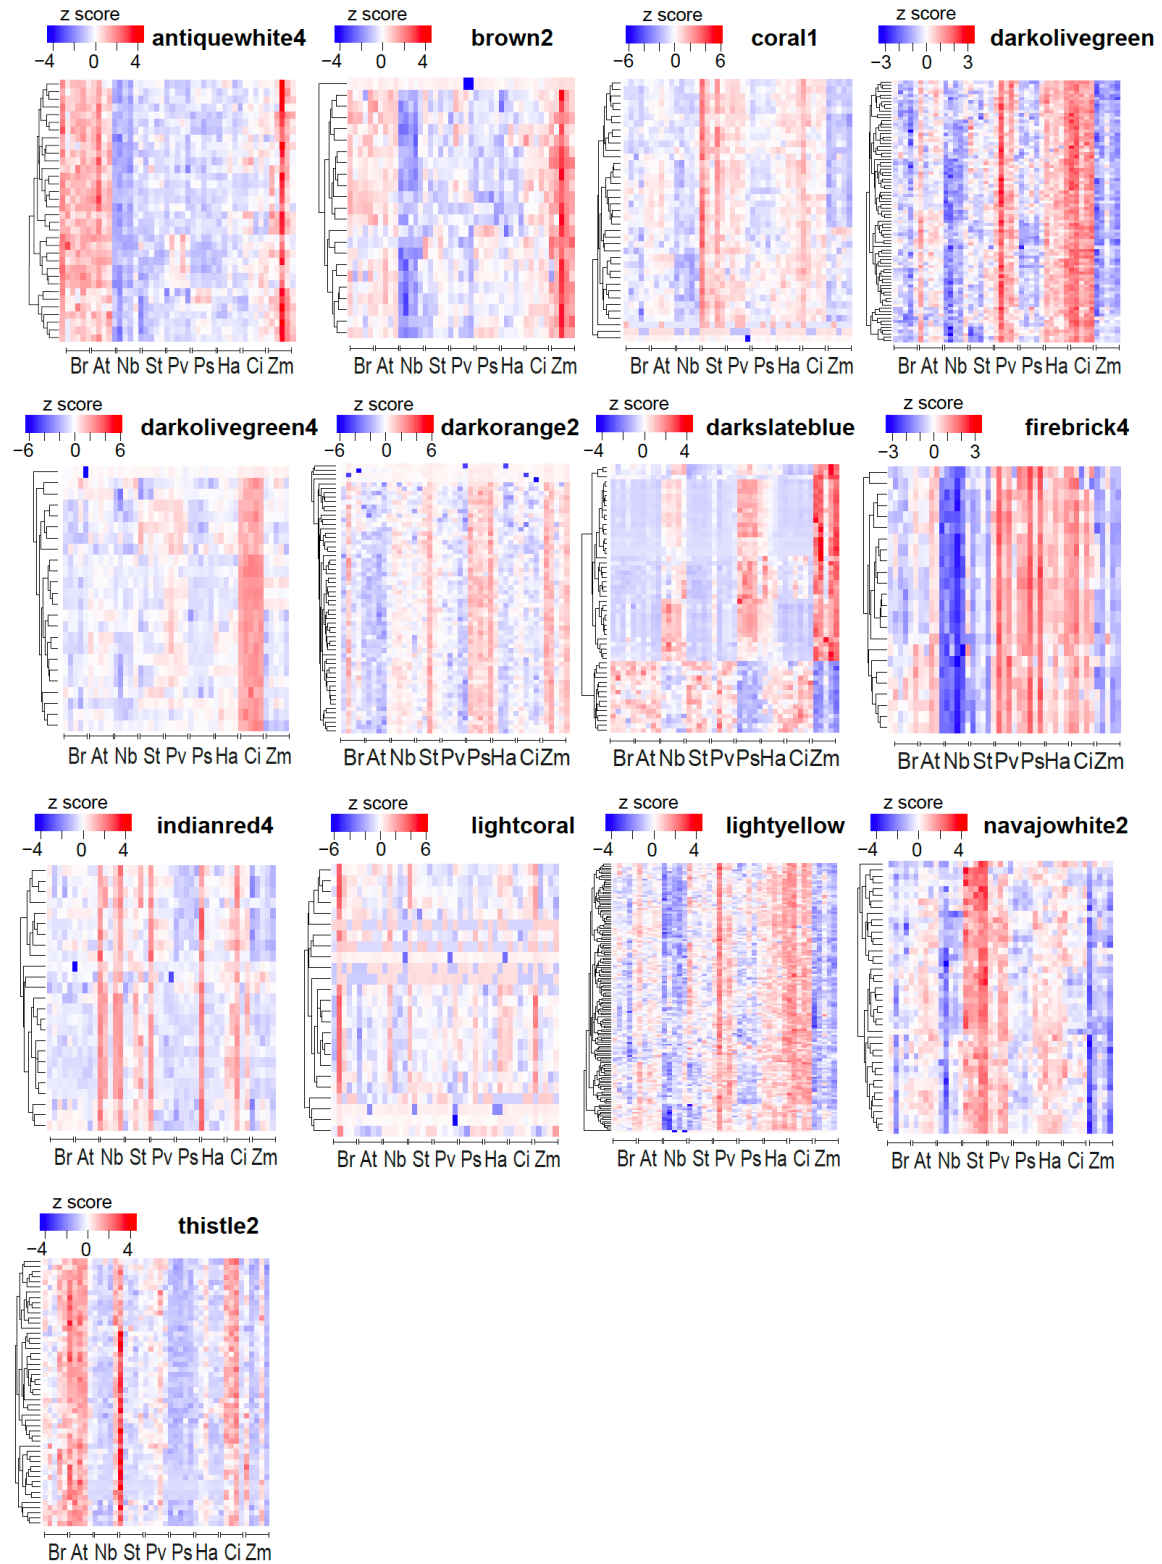

1

2 **Fig. S5.** Heatmaps of 13 modules enriched for DE genes of *M. persicae* colonies  
 3 on 9 plant species. The colour codes of the modules are indicated above the

1 heatmaps. Hierarchical clustering was done based on plant species as follows: Br,  
2 *B. rapa*; At, *A. thaliana*; Nb, *N. benthamiana*; St, *S. tuberosum*; Ci, *C. indicum*; Ha,  
3 *H. annuus*; Ps, *P. sativum*; Pv, *P. vulgaris*; Zm, *Z. mays*. Rows are scaled based  
4 log transformed TPM values, which are shown using a z-score as indicated.  
5

Modules enriched for genes expressed in guts

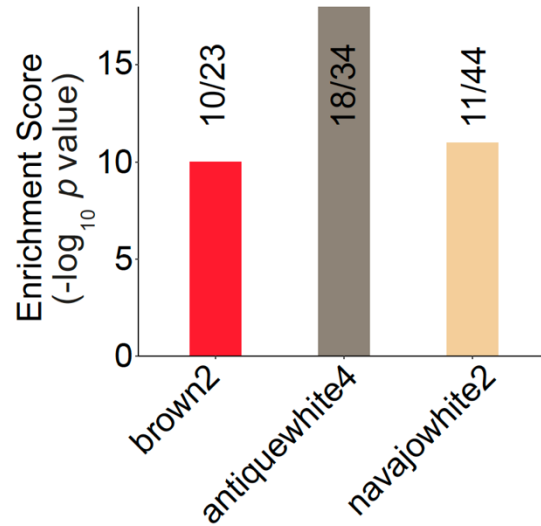

1

2 **Fig. S6.** Modules enriched for genes expressed in *M. persicae* guts. *M. persicae*  
3 DE genes were searched against a gut EST dataset (28). The x/y numbers above  
4 the bars indicate the number of genes in the enriched category (x) and the total  
5 number of genes in the module (y).

6

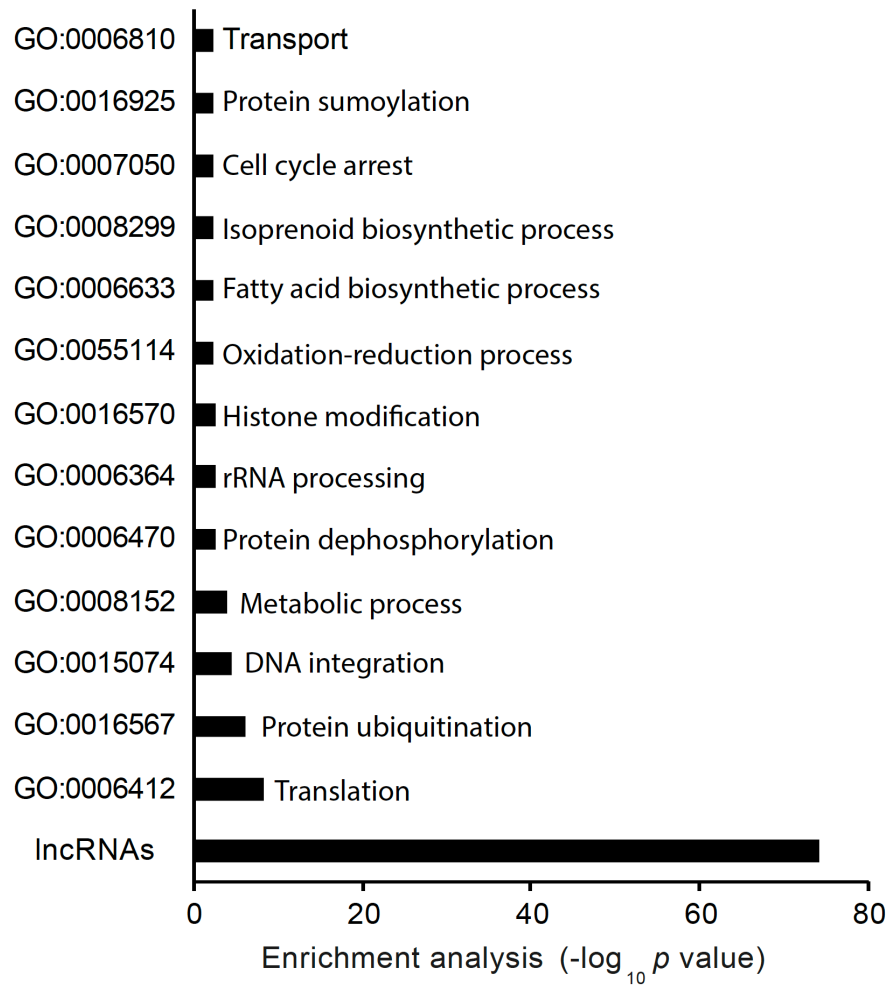

1  
2  
3  
4  
5  
6

**Fig. S7.** Enrichment analysis of aphid transcripts found in the feeding sites. Gene functional annotations were used. Enrichment analysis was calculated with Fisher's Exact Test by comparing the ratios of genes that belong to a GO category versus the total number of genes between the feeding site and the whole aphid.

```
>Ya1_exon2_148nt  
TTTCTCTTTTAAACCTAAAAACCAACCAACAAATCAAAAATGGGCGCTGAAAAGGTATCCATGAACA  
TCGTTGTCGTCGGACAAGTCCAATCTGCCAAGGCCATCAAGACCGTCGCCAAGGCCTCCCCAGCCACC  
AACCAATTGATG
```

1

2 **Fig. S8.** Nucleotide sequence of *Ya1* exon 2 used to identify *Ya* family members  
3 in *M. persicae* and other aphid species.

4

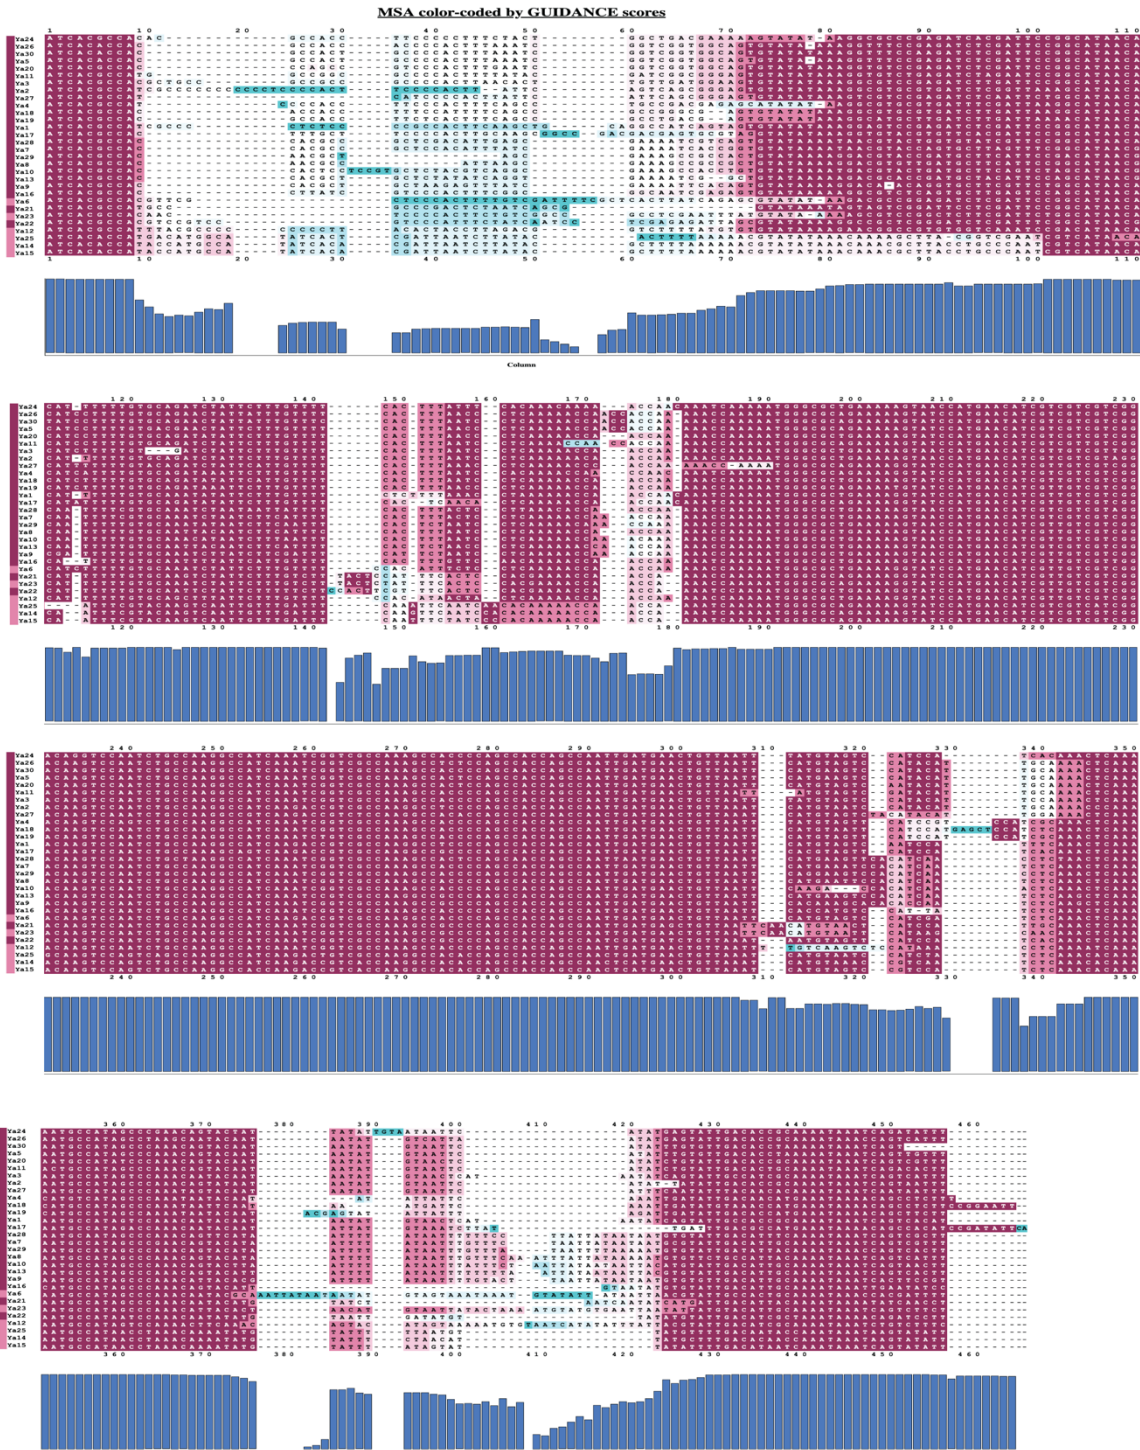

1  
2  
3 **Fig. S9.** Alignment of transcripts of 30 Ya gene family members. The alignment  
4 was used to generate Fig. 3A and the phylogenetic tree of Fig. 3B. Alignment was  
5 performed on online version of MAFFT (version 7,  
6 <https://mafft.cbrc.jp/alignment/server/index.html>) (19) with default settings. The



1 multiple alignment was subjected to GUIDANCE2 (<http://guidance.tau.ac.il/ver2/>)  
2 (20) to compute the residue-wise confidence scores and extract well-aligned  
3 residues. Nucleotides are highlighted (colour scale between red and turquoise) to  
4 indicate confidence of alignment (red is high confidence and turquoise is low). The  
5 bottom bar graph displays the scores of aligned nucleotides, as determined by  
6 GUIDANCE2.  
7

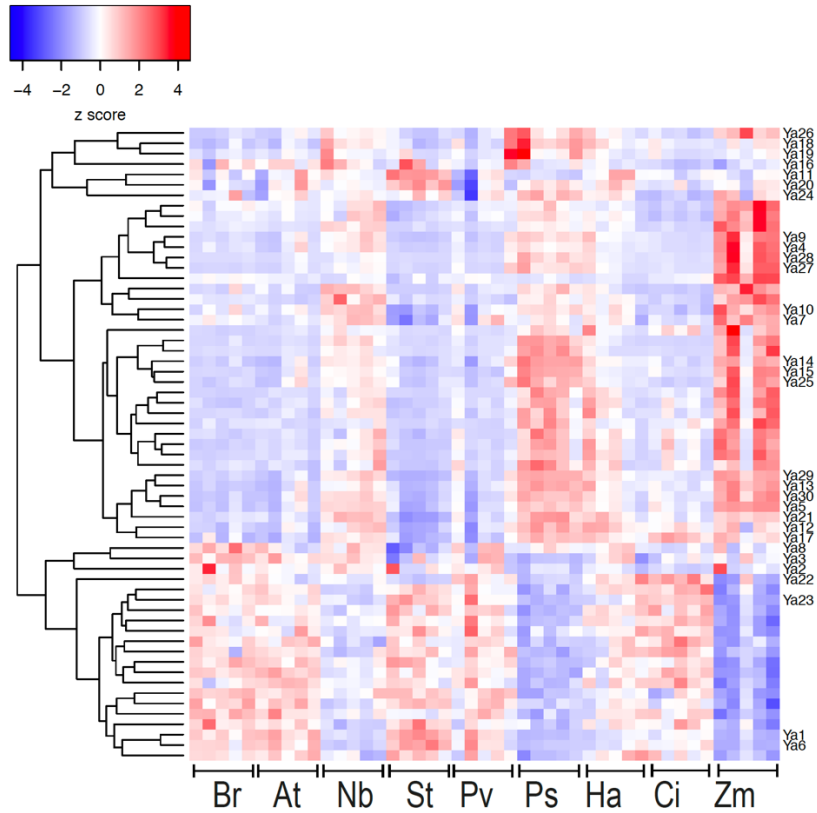

1

2 **Fig. S10.** Heatmap of darkslateblue module after manual annotation of the Ya  
 3 family. WGCNA analysis was repeated with the corrected set of Ya genes.  
 4 Heatmap was generated using log-transformed TPM values of all genes in the  
 5 module. Br, *B. rapa*; At, *A. thaliana*; Nb, *N. benthamiana*; St, *S. tuberosum*; Ci, *C.*  
 6 *indicum*; Ha, *H. annuus*; Ps, *P. sativum*; Pv, *P. vulgaris*; Zm, *Z. mays*. Rows are  
 7 scaled and represented as z-score.

8

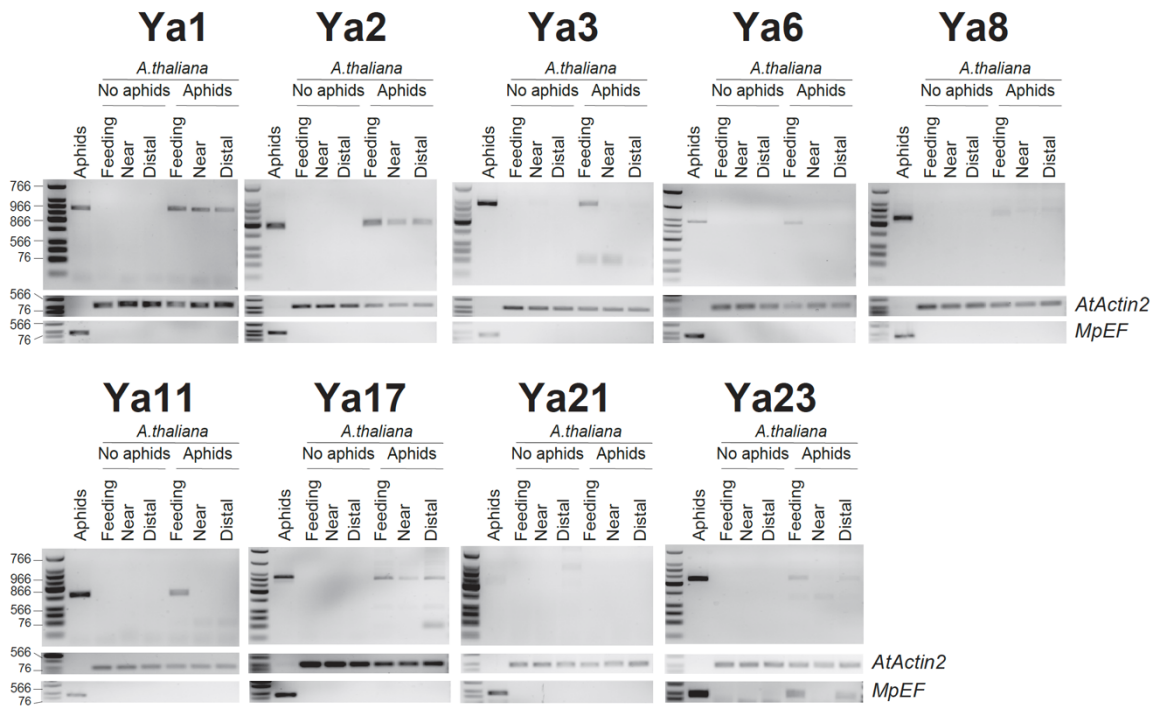

1

2 **Fig. S11.** RT-PCR experiments showing translocation of 9 *Ya* transcripts into  
 3 plants and systemic migration of *Ya1*, *Ya2*, and *Ya17* transcripts. Experimental  
 4 setup is shown in Fig. 4A. The *Ya* transcripts were amplified by RT-PCR using  
 5 gene-specific primers ([SI Appendix, Table S3](#)) and PCR products were separated  
 6 by 3% agarose gel. The bands corresponding to the PCR products were extracted  
 7 from the gel and sequenced directly by forward and/or reverse primers to verify the  
 8 identity of the *Ya* sequence.

9

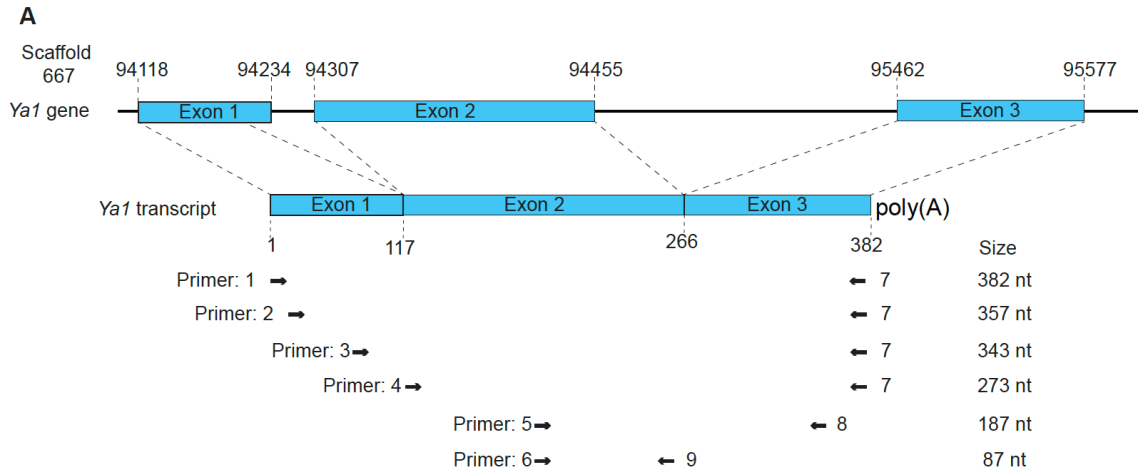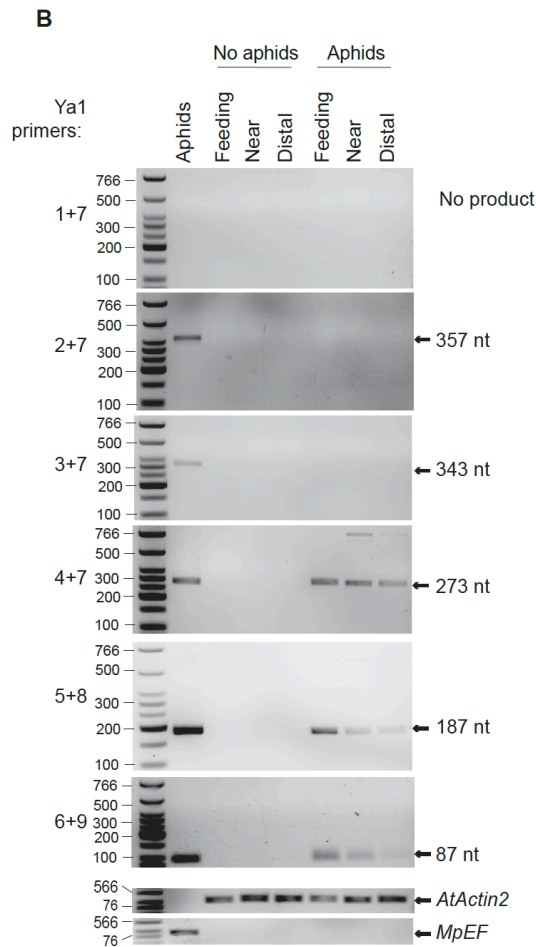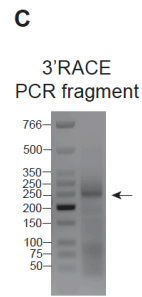

**D**

```

CCATGAACATCGTTGTCGTCGGACAAGTCCAAT | Exon 2
CTGCCAAGGCCATCAAGACCGTCGCCAAGGCC
TCCCCAGCCACCAACCAATTGATGAACTGTAA | Exon 3
TTCATGTAGTCAATCCATTTCAAATCAAAAATGC
CATAGTCCAAACAATAAATAATGTAACTCATAA
TATCAGTATTGCCACCGCAAATAAATCAGTCACA
TCCGATGTACATAACAACAAAAAAAAAAAAAAAAA
TCGATGCCGTCTTCTGCTTGAA poly A tail

```

RNA adaptor

1

2

3 **Fig. S12.** Identification of *Ya1* transcript sizes in aphids and plants. **(A)** Transcript  
 4 model of the *Ya1* gene. The three exons of the *Ya1* gene that form the transcript

1 are indicated as blue rectangles. The numbers above the *Ya* gene indicate the first  
2 and last nucleotide of each exon on scaffold 667 of the *M. persicae* genome  
3 assembly. The locations of the *Ya1* primers 1-9 ([SI Appendix, Table S2](#)) used to  
4 assess the presence of *Ya1* transcripts in aphids and in plants by RT-PCR are  
5 indicated as black arrows. **(B)** A 357-nt *Ya1* transcript was detected in aphids and  
6 not in plants, whereas the largest *Ya1* transcript detected in plants at aphid feeding  
7 sites and distal leaves is 273-nt (primers 4 and 7). Experimental setup is shown in  
8 Fig. 4A. RT-PCR products generated with primers shown in A were separated on  
9 3% agarose gels. Fragment sizes are indicated at right of the gels and correspond  
10 with the expected sizes as shown in A. Primers 1 and 7 did not generate a product  
11 in aphids nor in plants. **(C)** Results of a 3' RACE experiment. The 3' RACE PCR  
12 products were separated a 3% agarose gel. The band isolated from the gel and  
13 sequenced is shown with an arrow at right of the gel. **(D)** Sequence of the 3' RACE  
14 PCR fragment of the band shown in C. The sequence is identical to the sequences  
15 of the end of exon 2 (letters in blue font) and the entire exon 3 (letters in green  
16 font) of the annotated *Ya1* gene in the *M. persicae* genome. The *Ya1* transcript  
17 has a poly(A) tail (letters in red font). The RNA adaptor sequence used in 3' RACE  
18 protocol is indicated in yellow.  
19

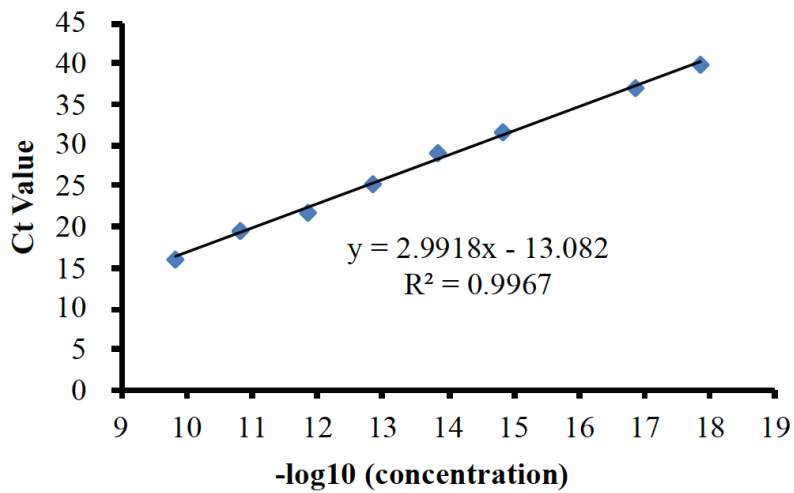

1  
2  
3  
4  
5  
6  
7

**Fig. S13.** Standard concentration curve of *Ya1* and cycles of PCR amplification. The 273-nt *Ya1* fragment in the plasmid pBI121 was used as the PCR template. qPCR were performed on a serial of dilution of the plasmid pBI121\_35S::*Ya1* from the highest concentration  $1.44E^{-10}$  g/  $\mu$ L to the lowest concentration  $1.44E^{-18}$  g/  $\mu$ L. x axis are minus log 10 transferred concentrations.

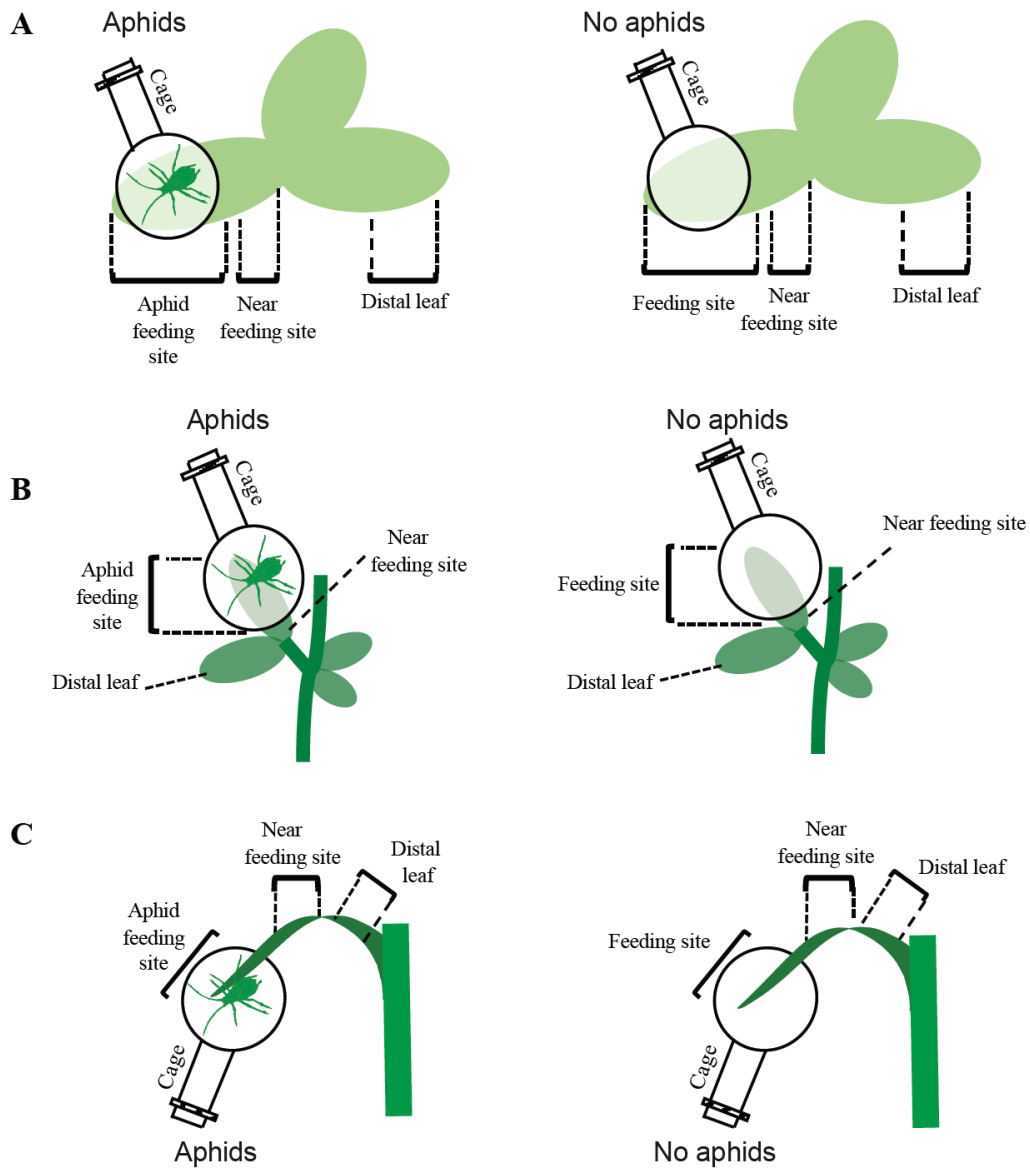

1  
2  
3  
4  
5  
6  
7  
8  
9

**Fig. S14.** Schematic overview of experimental setups to investigate systemic migration of aphid *Ya1* transcripts in *Brassica rapa*, *Pisum sativum* and *Zea mays*. (A) *Brassica rapa*. (B) *Pisum sativum*. (C) *Zea mays*. Aphid feeding site is the caged parts of the leaf. Distal sites include near-feeding sites that are located just externally of the caged leaf areas and more distal locations that are different leaves for *B. rapa* and *P. sativum* and further away of the caged area on the same leaf of *Z. mays*.

**A** 1 TTTCTCTTTTAAACCTAAAAACCAACCAACAAATCAAAAATGGGCGCTGAAAAGGTATCCATGAACATCGTTGTCGTCGGA 82  
 83 CAAGTCCAATCTGCCAAGGCCATCAAGACCGTCGCCAAGGCCTCCCCAGCCACCAACCAATTGATGAACTGTTAATTCATGT 164  
 165 AGTCAATCCATTTCAAACCTCAAAAATGCCATAGTCCAAACAATAAATAATGTAAGTACTATAATATCAGTATTGCCACCGC 246  
 247 AAAATAAATCAGTCACATCCGATGTAC 273

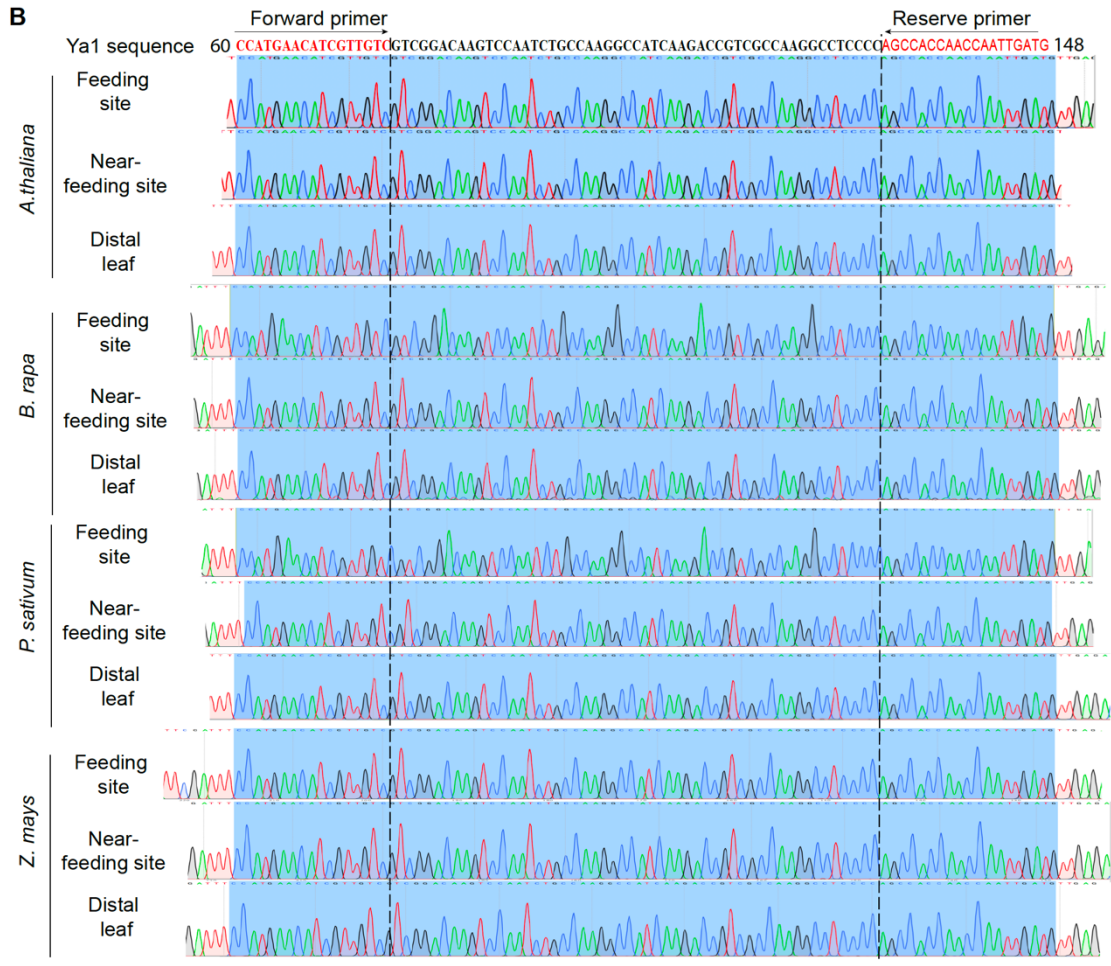

1  
 2 **Fig. S15.** Sequences of RT-PCR products of *M. persicae* *Ya1* transcripts amplified  
 3 from plants. The *Ya1* transcripts were amplified with *Ya1* forward and reverse  
 4 primers from feeding sites, near-feeding sites, and distal sites of *A. thaliana*, *B.*  
 5 *rapa*, *P. sativum* and *Z. mays* as per experimental setups shown in **Fig. 4A** and  
 6 **Suppl. Fig. S13**. The sequences shown were identical to the corresponding region  
 7 within the *Ya1* gene.

8



| Ya1 reference sequences  |                              | Ya1_273_nt                   |                                | Forward primer                 |                              |                      |  |
|--------------------------|------------------------------|------------------------------|--------------------------------|--------------------------------|------------------------------|----------------------|--|
| 35S::Ya1 lines           | line_8-8#1                   | <u>tttctcttttaaacct</u> aaaa | aaaccaaccaacaaatcaaaa          | <u>atggcgctg</u> aaaagggtatc   | <u>catgaacat</u> ggtgtgtgctc | ggacaagtccaatctgccaa |  |
|                          | line_8-8#2                   | <u>tttctcttttaaacct</u> aaaa | aaaccaaccaacaaatcaaaa          | <u>atggcgctg</u> aaaagggtatc   | <u>catgaacat</u> ggtgtgtgctc | ggacaagtccaatctgccaa |  |
|                          | line_9-9#1                   | <u>tttctcttttaaacct</u> aaaa | aaaccaaccaacaaatcaaaa          | <u>atggcgctg</u> aaaagggtatc   | <u>catgaacat</u> ggtgtgtgctc | ggacaagtccaatctgccaa |  |
|                          | line_9-9#2                   | <u>tttctcttttaaacct</u> aaaa | aaaccaaccaacaaatcaaaa          | <u>atggcgctg</u> aaaagggtatc   | <u>catgaacat</u> ggtgtgtgctc | ggacaagtccaatctgccaa |  |
| 35S::Ya1_3ATGs_mut lines | line_1-1#1                   | <u>tttctcttttaaacct</u> aaaa | aaaccaaccaacaaatcaaaa          | <u>tagggcgctg</u> aaaagggtatc  | <u>ctagaacat</u> ggtgtgtgctc | ggacaagtccaatctgccaa |  |
|                          | line_1-1#2                   | <u>tttctcttttaaacct</u> aaaa | aaaccaaccaacaaatcaaaa          | <u>tagggcgctg</u> aaaagggtatc  | <u>ctagaacat</u> ggtgtgtgctc | ggacaagtccaatctgccaa |  |
|                          | line_3-3#1                   | <u>tttctcttttaaacct</u> aaaa | aaaccaaccaacaaatcaaaa          | <u>tagggcgctg</u> aaaagggtatc  | <u>ctagaacat</u> ggtgtgtgctc | ggacaagtccaatctgccaa |  |
|                          | line_3-3#2                   | <u>tttctcttttaaacct</u> aaaa | aaaccaaccaacaaatcaaaa          | <u>tagggcgctg</u> aaaagggtatc  | <u>ctagaacat</u> ggtgtgtgctc | ggacaagtccaatctgccaa |  |
| line_4-4#1               | <u>tttctcttttaaacct</u> aaaa | aaaccaaccaacaaatcaaaa        | <u>tagggcgctg</u> aaaagggtatc  | <u>ctagaacat</u> ggtgtgtgctc   | ggacaagtccaatctgccaa         |                      |  |
| line_4-4#2               | <u>tttctcttttaaacct</u> aaaa | aaaccaaccaacaaatcaaaa        | <u>tagggcgctg</u> aaaagggtatc  | <u>ctagaacat</u> ggtgtgtgctc   | ggacaagtccaatctgccaa         |                      |  |
| 35S::Ya1 lines           | line_8-8#1                   | ggccatcaagaccgtgccc          | aggcctccccgccaccaac            | caattg <u>atg</u> aactgttaatt  | catgtagtcaatccaattca         | aactcaaaaatgccatagtc |  |
|                          | line_8-8#2                   | ggccatcaagaccgtgccc          | aggcctccccgccaccaac            | caattg <u>atg</u> aactgttaatt  | catgtagtcaatccaattca         | aactcaaaaatgccatagtc |  |
|                          | line_9-9#1                   | ggccatcaagaccgtgccc          | aggcctccccgccaccaac            | caattg <u>atg</u> aactgttaatt  | catgtagtcaatccaattca         | aactcaaaaatgccatagtc |  |
|                          | line_9-9#2                   | ggccatcaagaccgtgccc          | aggcctccccgccaccaac            | caattg <u>atg</u> aactgttaatt  | catgtagtcaatccaattca         | aactcaaaaatgccatagtc |  |
| 3ATGs_mut lines          | line_1-1#1                   | ggccatcaagaccgtgccc          | aggcctccccgccaccaac            | caattg <u>tag</u> aactgttaatt  | catgtagtcaatccaattca         | aactcaaaaatgccatagtc |  |
|                          | line_1-1#2                   | ggccatcaagaccgtgccc          | aggcctccccgccaccaac            | caattg <u>tag</u> aactgttaatt  | catgtagtcaatccaattca         | aactcaaaaatgccatagtc |  |
|                          | line_3-3#1                   | ggccatcaagaccgtgccc          | aggcctccccgccaccaac            | caattg <u>tag</u> aactgttaatt  | catgtagtcaatccaattca         | aactcaaaaatgccatagtc |  |
|                          | line_3-3#2                   | ggccatcaagaccgtgccc          | aggcctccccgccaccaac            | caattg <u>tag</u> aactgttaatt  | catgtagtcaatccaattca         | aactcaaaaatgccatagtc |  |
| line_4-4#1               | ggccatcaagaccgtgccc          | aggcctccccgccaccaac          | caattg <u>tag</u> aactgttaatt  | catgtagtcaatccaattca           | aactcaaaaatgccatagtc         |                      |  |
| line_4-4#2               | ggccatcaagaccgtgccc          | aggcctccccgccaccaac          | caattg <u>tag</u> aactgttaatt  | catgtagtcaatccaattca           | aactcaaaaatgccatagtc         |                      |  |
| 35S::Ya1 lines           | line_8-8#1                   | caacaatacaataatagt           | aactcataatcagttattg            | ccacgcgcaaaaataa <u>atcagt</u> | <u>cacatccgatgtac</u>        |                      |  |
|                          | line_8-8#2                   | caacaatacaataatagt           | aactcataatcagttattg            | ccacgcgcaaaaataa <u>atcagt</u> | <u>cacatccgatgtac</u>        |                      |  |
|                          | line_9-9#1                   | caacaatacaataatagt           | aactcataatcagttattg            | ccacgcgcaaaaataa <u>atcagt</u> | <u>cacatccgatgtac</u>        |                      |  |
|                          | line_9-9#2                   | caacaatacaataatagt           | aactcataatcagttattg            | ccacgcgcaaaaataa <u>atcagt</u> | <u>cacatccgatgtac</u>        |                      |  |
| 3ATGs_mut lines          | line_1-1#1                   | caacaatacaataatagt           | aactcataatcagttattg            | ccacgcgcaaaaataa <u>atctgt</u> | <u>cacatccgatgtac</u>        |                      |  |
|                          | line_1-1#2                   | caacaatacaataatagt           | aactcataatcagttattg            | ccacgcgcaaaaataa <u>atctgt</u> | <u>cacatccgatgtac</u>        |                      |  |
|                          | line_3-3#1                   | caacaatacaataatagt           | aactcataatcagttattg            | ccacgcgcaaaaataa <u>atctgt</u> | <u>cacatccgatgtac</u>        |                      |  |
|                          | line_3-3#2                   | caacaatacaataatagt           | aactcataatcagttattg            | ccacgcgcaaaaataa <u>atctgt</u> | <u>cacatccgatgtac</u>        |                      |  |
| line_4-4#1               | caacaatacaataatagt           | aactcataatcagttattg          | ccacgcgcaaaaataa <u>atcagt</u> | <u>cacatccgatgtac</u>          |                              |                      |  |
| line_4-4#2               | caacaatacaataatagt           | aactcataatcagttattg          | ccacgcgcaaaaataa <u>atcagt</u> | <u>cacatccgatgtac</u>          |                              |                      |  |

1  
2  
3  
4  
5  
6

Reverse primer

**Fig. S16.** Sequences of RT-PCR products of *Ya1* and *Ya1\_3ATGs\_mut* transcripts amplified from transgenic *A. thaliana* plants (Figure 5D). Nucleotides underlined lowercase are sequences of forward and reverse primer. ATG and TAG (mutated ATG) are in red.

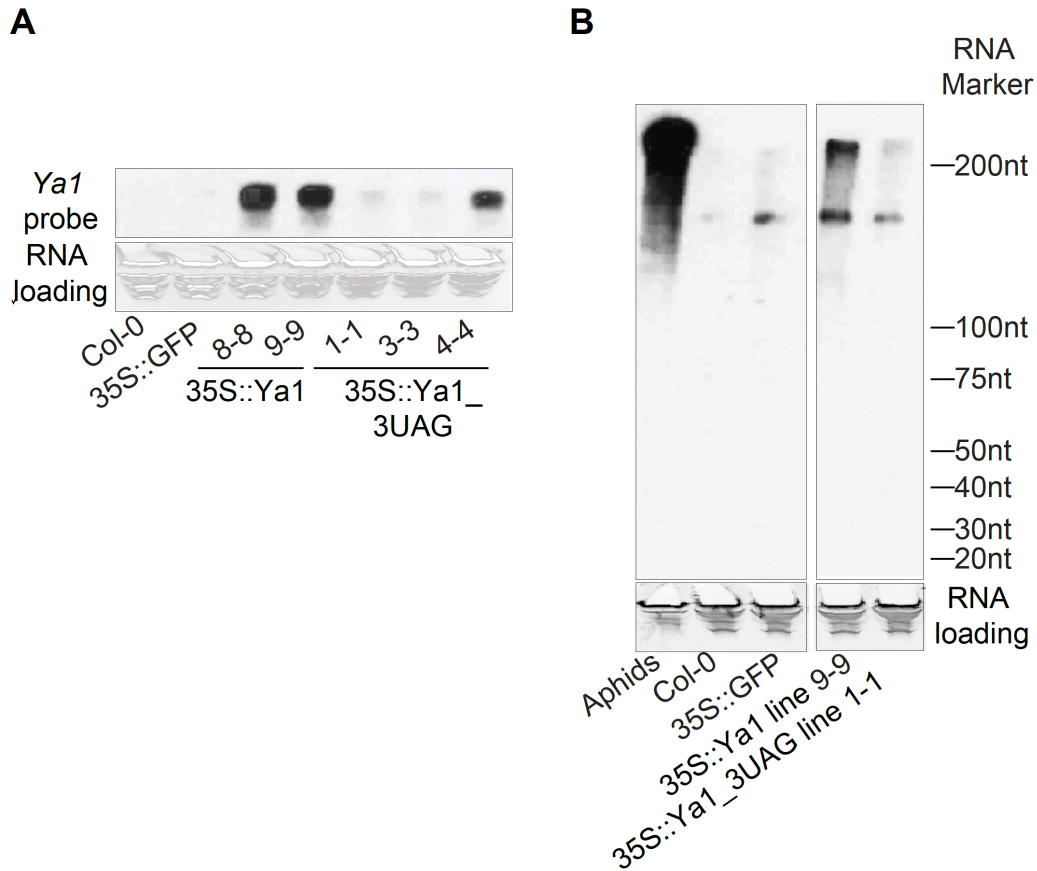

1  
2 **Fig. S17.** Northern blot to confirm expression of *Ya1* and *Ya1\_3UAG* expressed  
3 in transgenic *A. thaliana* plants. (A) Northern blot hybridizations with a *Ya1* probe  
4 to detect *Ya1* and *Ya1\_3UAG* expressed in transgenic *A. thaliana* plants. (B) Full  
5 length of *Ya1* and *Ya1\_3UAG* were detected in the transgenic plants. Pre-stain  
6 RNA markers (DynaMarker) were used to estimate the size of RNAs.  
7

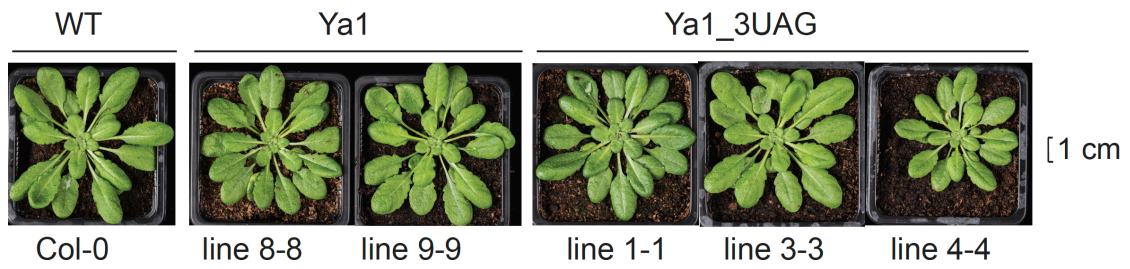

1

2 **Fig. S18.** Comparison of phenotypes of *Ya1* transgenic *A. thaliana* plants.

3 Transgenic *A. thaliana* (Col-0) plants that express *Ya1* and *Ya1\_3UAG* under

4 control of the 35S promoter did not show obvious morphological differences

5 compared to the non-transformed wild type Col-0 plants.

6

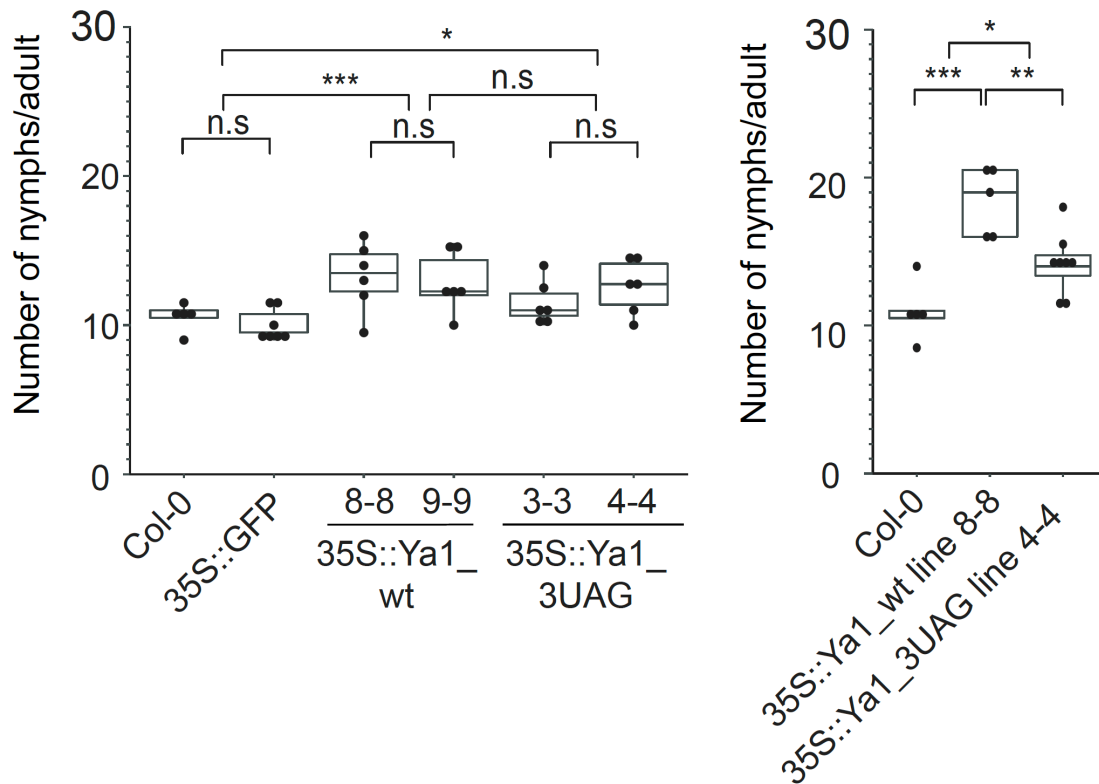

1

2 **Fig. S19.** Repeats showing that *M. persicae* Ya lncRNA promotes *M.*  
 3 *persicae* colonization on *A. thaliana*. Stable expression of *Ya1\_wt* and *Ya1\_3UAG*  
 4 promotes *M. persicae* reproduction on plants. Each data point (black dot)  
 5 represents number of nymphs produced by an adult female aphid per plant. Box  
 6 plots show distribution of data points collected from n = 5-8 female aphids per *A.*  
 7 *thaliana* line. \* $p < 0.05$ , \*\*  $p < 0.01$ , \*\*\* $p < 0.001$ , ANOVA followed by a Tukey–  
 8 Kramer post-hoc test.

9

10

1 **Table S1.** Transcriptome assembly statistics. RNA-seq reads were derived from  
 2 samples LIB1777 (1) and colonies on 5 independent plants (1-5) of *Arabidopsis*  
 3 *thaliana* (At); Br, *Brassica rapa* (Br), *Nicotiana benthamiana* (Nb), *Solanum*  
 4 *tuberosum* (St), *Chrysanthemum indicum* (Ci), *Helianthus annuus* (Ha), *Pisum*  
 5 *sativum* (Ps), *Phaseolus vulgaris* (Pv) and *Zea mays* (Zm). The reads were  
 6 mapped to the *M. persicae* G006 genome assembly (1).

7 <sup>a</sup> Total transcripts were assembled from mapped reads.

8 <sup>b,c</sup> Transcripts that correspond to genes identified previously in Mathers et al.  
 9 2017 (1).

10 <sup>d</sup> Novel transcript as identified in the transcriptome assembly reported herein.

11

| Samples | Total reads | Mapped reads | Percentage of mapped reads | Transcripts        |                    |                    |                    |
|---------|-------------|--------------|----------------------------|--------------------|--------------------|--------------------|--------------------|
|         |             |              |                            | Total <sup>a</sup> | Known <sup>b</sup> | Genes <sup>c</sup> | Novel <sup>d</sup> |
| LIB1777 | 182928264   | 117579937    | 64.28                      | 87444              | 18750              | 11332              | 68694              |
| At1     | 35027735    | 31609619     | 90.24                      | 61983              | 17781              | 10486              | 44202              |
| At2     | 30317626    | 27641464     | 91.17                      |                    |                    |                    |                    |
| At3     | 32270976    | 29367540     | 91                         |                    |                    |                    |                    |
| At4     | 33889504    | 30765104     | 90.78                      |                    |                    |                    |                    |
| At5     | 29871796    | 27369312     | 91.62                      |                    |                    |                    |                    |
| Ps1     | 33997244    | 31321585     | 92.13                      | 60443              | 17737              | 10528              | 42706              |
| Ps2     | 33572880    | 30992391     | 92.31                      |                    |                    |                    |                    |
| Ps3     | 30706147    | 28148247     | 91.67                      |                    |                    |                    |                    |
| Ps4     | 38851016    | 35655100     | 91.77                      |                    |                    |                    |                    |
| Ps5     | 23736763    | 20424890     | 86.05                      |                    |                    |                    |                    |
| Br1     | 36105440    | 33390772     | 92.48                      | 58293              | 17750              | 10489              | 40543              |
| Br2     | 27368493    | 23985300     | 87.64                      |                    |                    |                    |                    |
| Br3     | 28484604    | 26110873     | 91.67                      |                    |                    |                    |                    |
| Br4     | 27486534    | 25035464     | 91.08                      |                    |                    |                    |                    |
| Br5     | 30044024    | 27584912     | 91.81                      |                    |                    |                    |                    |
| Ci1     | 31213071    | 28395530     | 90.97                      | 65917              | 17856              | 10621              | 48061              |
| Ci2     | 26059223    | 23430480     | 89.91                      |                    |                    |                    |                    |
| Ci3     | 27469301    | 24621304     | 89.63                      |                    |                    |                    |                    |
| Ci4     | 32534564    | 29376935     | 90.29                      |                    |                    |                    |                    |
| Ci5     | 36510146    | 33342272     | 91.32                      |                    |                    |                    |                    |
| Zm1     | 23898955    | 21330499     | 89.25                      | 61157              | 17886              | 10610              | 43271              |
| Zm2     | 32663254    | 30362632     | 92.96                      |                    |                    |                    |                    |
| Zm3     | 38833395    | 32998965     | 84.98                      |                    |                    |                    |                    |
| Zm4     | 36223785    | 33199732     | 91.65                      |                    |                    |                    |                    |
| Zm5     | 37985100    | 34900276     | 91.88                      |                    |                    |                    |                    |
| Nb1     | 26749263    | 23973979     | 89.62                      | 57533              | 17567              | 10444              | 39966              |
| Nb2     | 28476921    | 25844725     | 90.76                      |                    |                    |                    |                    |
| Nb3     | 30481687    | 28348224     | 93                         |                    |                    |                    |                    |
| Nb4     | 31075574    | 28936577     | 92.12                      |                    |                    |                    |                    |
| Nb5     | 25055052    | 22819867     | 91.08                      |                    |                    |                    |                    |

| Samples      | Total reads | Mapped reads | Percentage of mapped reads | Transcripts        |                    |                    |                    |
|--------------|-------------|--------------|----------------------------|--------------------|--------------------|--------------------|--------------------|
|              |             |              |                            | Total <sup>a</sup> | Known <sup>b</sup> | Genes <sup>c</sup> | Novel <sup>d</sup> |
| Ps1          | 22202831    | 19882967     | 89.55                      |                    |                    |                    |                    |
| Ps2          | 26907680    | 24899984     | 92.54                      |                    |                    |                    |                    |
| Ps3          | 30923478    | 28678037     | 92.74                      | 56431              | 17590              | 10488              | 38841              |
| Ps4          | 37835896    | 34845885     | 92.10                      |                    |                    |                    |                    |
| Ps5          | 30745946    | 28130700     | 91.49                      |                    |                    |                    |                    |
| St1          | 22647808    | 19265819     | 85.07                      |                    |                    |                    |                    |
| St2          | 26239515    | 23358283     | 89.02                      |                    |                    |                    |                    |
| St3          | 29668113    | 27521716     | 92.77                      | 60662              | 17731              | 10537              | 42931              |
| St4          | 32534760    | 30241012     | 92.95                      |                    |                    |                    |                    |
| St5          | 32905595    | 30331494     | 92.18                      |                    |                    |                    |                    |
| Ha1          | 34475345    | 31538679     | 91.48                      |                    |                    |                    |                    |
| Ha2          | 39135872    | 36179328     | 92.45                      |                    |                    |                    |                    |
| Ha3          | 32762153    | 29883530     | 91.21                      | 58152              | 17744              | 10490              | 40408              |
| Ha4          | 20135006    | 18438242     | 91.57                      |                    |                    |                    |                    |
| Ha5          | 24340322    | 22404095     | 92.05                      |                    |                    |                    |                    |
| <b>Total</b> |             |              |                            | 45972              | 30127              | 18529              | 15845              |

1

**Table S2.** Statistics of analyses of RNA-seq data retrieved from aphid-exposed (feeding sites) and non-exposed (control) leaves. RNA-seq reads derived from four biological replicates per treatment were mapped to both *A. thaliana* Col-0 (TAIR10) and *M. persicae* (Mp) genomes (1). \*Reads mapping to Mp were realigned to At to find uniquely mapping Mp reads. The unique reads were then assigned to the transcripts obtained from the transcriptome assembly v2. ^ represents transcripts at TPM  $\geq$  50 in at least one biological replicate and presence in at least three replicates.

|                        | Biological Replicate | Total reads (million) | Reads mapped to At (million) | Reads mapped to At (%) | Reads mapped to Mp | Reads mapped to Mp (%) | Reads mapped to At | Unique Mp reads* | Mp transcripts (TPM $\geq$ 50) |                                            |
|------------------------|----------------------|-----------------------|------------------------------|------------------------|--------------------|------------------------|--------------------|------------------|--------------------------------|--------------------------------------------|
|                        |                      |                       |                              |                        |                    |                        |                    |                  | Number of transcripts          | Number of low-coding potential transcripts |
| Aphid feeding sites    | 1                    | 28                    | 25                           | 90.61                  | 18007              | 0.0631                 | 5                  | 18002            | 2928                           | 170                                        |
|                        | 2                    | 21                    | 19                           | 90.02                  | 242628             | 1.1091                 | 0                  | 242628           | 2599                           | 280                                        |
|                        | 3                    | 24                    | 22                           | 90.39                  | 3847               | 0.0153                 | 2                  | 3845             | 1837                           | 79                                         |
|                        | 4                    | 24                    | 21                           | 88.11                  | 657024             | 2.6969                 | 3                  | 657021           | 3154                           | 336                                        |
|                        |                      |                       |                              |                        |                    |                        |                    |                  | <b>3186<sup>^</sup></b>        | <b>201<sup>^</sup></b>                     |
| No aphid control sites | 1                    | 31                    | 28                           | 90.53                  | 35                 | 0.0001                 | 23                 | 12               | 0                              | 0                                          |
|                        | 2                    | 22                    | 20                           | 91.08                  | 9                  | 0.0000                 | 5                  | 4                | 0                              | 0                                          |
|                        | 3                    | 28                    | 26                           | 90.79                  | 5                  | 0.0000                 | 5                  | 0                | 0                              | 0                                          |
|                        | 4                    | 21                    | 19                           | 90.55                  | 17                 | 0.0001                 | 14                 | 3                | 0                              | 0                                          |

**Table S3. Primers used in this study.**

**Primers for qRT-PCR for RNAi**

| <b>Primer names</b> | <b>Sequence (5'&gt; 3')</b> |
|---------------------|-----------------------------|
| Ya1 F               | ATCAAGACCGTCGCCAAG          |
| Ya1 R               | TTGCGGTGGCAATACTGATA        |

**Primers for qRT-PCR for detection in plants**

| <b>Primer names</b> | <b>Sequence (5'&gt; 3')</b> |
|---------------------|-----------------------------|
| Ya1 primer1         | ATCACGCCATCGCCCCTCTC        |
| Ya1 primer2         | AAGCTGCAGGCCATCAGT          |
| Ya1 primer3         | AGTAGTGTATATAAAGGAGTCC      |
| Ya1 primer4         | CGATTCCGGCATAACACAT         |
| Ya1 primer5         | GTTTTCTCTTTTAAACCT          |
| Ya1 primer6         | CCATGAACATCGTTGTCGTC        |
| Ya1 primer7         | ATGTGACTGATTTATTTTGC        |
| Ya1 primer8         | GCGGTGGCAATACTGATATTAT      |
| Ya1 primer9         | CATCAATTGGTTGGTGGCT         |
| Ya1 Forward         | CCATGAACATCGTTGTCGTC        |
| Ya1 Reverse         | GCGGTGGCAATACTGATATTAT      |
| Ya2 Forward         | ACAAGTCCAATCTGCCAAGG        |
| Ya2 Reverse         | TGCGGTGTCAATATAATATG        |
| Ya3F Forward        | CTTGATTCCGGCATAACACATC      |
| Ya3 Reverse         | AAATGACTGATTTATTTTGC        |
| Ya6 Forward         | CATAACACATCTTTTTGTG         |
| Ya6 Reverse         | AAAATCGTGGTTTATTTTGC        |
| Ya8 Forward         | CCATGAACATCGTTGTCGTC        |
| Ya8 Reverse         | AAATGACTGATTTATTTTGT        |
| Ya11 Forward        | CCACCAAAAACCAAAAATGG        |
| Ya11 Reverse        | AAGTGTCTGATTTATTTTGC        |
| Ya17 Forward        | GGCATAACACATATTTTGT         |
| Ya17 Reverse        | TGAATATCGGATGTGGCTGTT       |
| Ya23 Forward        | CTTCTGTCCGCCGCTCGAATT       |
| Ya23 Reverse        | AGAAGACTGATTTATTTTGGAA      |



## Primers for cloning

**Underlined lower case nucleotides indicate restriction enzyme sequences**

### Primer names Sequence (5'> 3')

|                |                                                           |
|----------------|-----------------------------------------------------------|
| Ya1_F (273 nt) | TTTCTCTTTTAAACCTAAAAAA                                    |
| Ya1_R (273 nt) | GTACATCGGATGTGACTGATT                                     |
| attB1_Ya1      | <u>acaagtttg</u> tacaaaaagcaggctagtTTTCTCTTTTAAACCTAAAAAA |
| attB2_Ya1      | <u>accactttgtacaagaaagctgggt</u> GTACATCGGATGTGACTGATT    |
| Ya1_BamHI      | <u>cgggggactctagaggatccagt</u> TTTCTCTTTTAAACCTAA         |
| Ya1_SacI       | <u>aaattcgagctc</u> GTACATCGGATGTGACTGATTT                |
| MutateF        | <u>cgggggactctagaggatccagt</u> TTTCTCTTTTAAACCTAA         |
| ATG41_F        | TTTAAACCTAAAAACCAACCAACAAATCAAATAGGGCGCTGAAAAGGTAT        |
| ATG41_R        | ATACCTTTTCAGCGCCCTATTTTGATTTGTTGGTTGGTTTTTTAGGTTTAA       |
| ATG62_F        | GGCGCTGAAAAGGTATCCTAGAACATCGTTGTCGTCGG                    |
| ATG62_R        | CCGACGACAACGATGTTCTAGGATACCTTTTCAGCGCC                    |
| ATG146_F       | CCCCAGCCACCAACCAATTGTAGAACTGTTAATTCATGTAGT                |
| ATG146_R       | ACTACATGAATTAACAGTTCTACAATTGGTTGGTGGCTGGGG                |
| MutateR        | <u>aaattcgagctc</u> GTACATCGGATGTGACTGATTT                |

## Probes for northern blot hybridizations

### Probe Sequence (5'> 3')

Probe of AtU6 CTCGATTTATGCGTGTGCATCCTTGC

## Adapter and primers for 3'RACE

### Names

|                                                        | Sequence (5'> 3')           |
|--------------------------------------------------------|-----------------------------|
| Ya1 Forward primer                                     | GGACAAGTCCAATCTGC           |
| 3' RNA Adapter (5' Phosphorylation and 3' Inverted dT) | P-UCGUAUGCCGUCUUCUGCUUGUIdT |
| oligo sequence complementary to 3'RNA adapter          | CAAGCAGAAGACGGCATAACGA      |

## Datasets

**Dataset S1.** List of differentially expressed transcripts of *M. persicae* colonies on 8 divergent plant species compared to *M. persicae* on *Arabidopsis thaliana* (At); Br, *Brassica rapa* (Br), *Nicotiana benthamiana* (Nb), *Solanum tuberosum* (St), *Chrysanthemum indicum* (Ci), *Helianthus annuus* (Ha), *Pisum sativum* (Ps), *Phaseolus vulgaris* (Pv) and *Zea mays* (Zm). 1, differentially expressed (DE) transcript; 0, not DE. Transcript ID refers to the transcriptome assembly *M. persicae* G006 v2 (GSE129669) generated herein.

**Dataset S2.** Results of WGCNA analyses with 13 modules enriched in differentially expressed genes (Tab A) and the 64 other co-expression modules (Tab B). Genes of tandem repeats in the scaffold are highlighted in yellow or green and numbers of tandemly repeated groups identified in each module are summarized in the table at right. ^ indicates whether genes are differentially expressed (DE), encode candidate lncRNAs, and are expressed in salivary glands and guts of *M. persicae*.

**Dataset S3.** List of *M. persicae* candidate lncRNAs (Tab A) and other transcripts (Tab B) found in *A. thaliana* leaves exposed to *M. persicae* (feeding sites).

**Dataset S4.** Characteristics of the 30 *Ya* gene family members upon manual annotation. Gene IDs correspond to version 3 GFF generated after manual correction.

**Dataset S5.** Annotation of *Ya* gene in five aphid species in addition to *M. persicae*. Accession numbers and versions of genome assemblies and RNASeq data used for annotations of the *Ya* genes (Tab A); Genomic locations, strand information and annotation of *Ya* genes (Tab B).

## SI References

1. T. C. Mathers, Y. Chen, G. Kaithakottil, F. Legeai, S. T. Mugford, P. Baa-Puyoulet, A. Bretaudeau, B. Clavijo, S. Colella, O. Collin, T. Dalmay, T. Derrien, H. Feng, T. Gabaldón, A. Jordan, I. Julca, G. J. Kettles, K. Kowitwanich, D. Lavenier, P. Lenzi, S. Lopez-Gomollon, D. Loska, D. Mapleson, F. Maumus, S. Moxon, D. R. Price, A. Sugio, M. van Munster, M. Uzest, D. Waite, G. Jander, D. Tagu, A. C. Wilson, C. van Oosterhout, D. Swarbreck, S. A. Hogenhout, Rapid transcriptional plasticity of duplicated gene clusters enables a clonally reproducing aphid to colonise diverse plant species. *Genome Biol.* **18**, 27 (2017).
2. F. Krueger, Trim Galore: a wrapper tool around Cutadapt and FastQC to consistently apply quality and adapter trimming to FastQ files, with some extra functionality for MspI-digested RRBS-type (Reduced Representation Bisulfite-Seq) libraries. URL [http://www.bioinformatics.babraham.ac.uk/projects/trim\\_galore/](http://www.bioinformatics.babraham.ac.uk/projects/trim_galore/). (2012).
3. M. Pertea, D. Kim, G. M. Pertea, J. T. Leek, S. L. Salzberg, Transcript-level expression analysis of RNA-seq experiments with HISAT, StringTie and Ballgown. *Nat. Protoc.* **11**, 1650-1667 (2016).
4. H. Li, B. Handsaker, A. Wysoker, T. Fennell, J. Ruan, N. Homer, G. Marth, G. Abecasis, R. Durbin, 1000 Genome Project Data Processing Subgroup, The sequence Alignment/Map format and SAMtools. *Bioinformatics* **25**, 2078-2079 (2009).
5. M. Pertea, G. M. Pertea, C. M. Antonescu, T. C. Chang, J. T. Mendell, S. L. Salzberg, StringTie enables improved reconstruction of a transcriptome from RNA-seq reads. *Nat. Biotechnol.* **33**, 290-295 (2015).
6. A. Roberts, H. Pimentel, C. Trapnell, L. Pachter, Identification of novel transcripts in annotated genomes using RNA-Seq. *Bioinformatics* **27**, 2325-2329 (2011).
7. L. Venturini, S. Caim, G. G. Kaithakottil, D. L. Mapleson, D. Swarbreck, Leveraging multiple transcriptome assembly methods for improved gene structure annotation. *Gigascience* **7** (2018).

8. A. Bairoch, R. Apweiler, The SWISS-PROT protein sequence database and its supplement TrEMBL in 2000. *Nucleic. Acids Res.* **28**, 45-48 (2000).
9. R. D. Finn, P. Coghill, R. Y. Eberhardt, S. R. Eddy, J. Mistry, A. L. Mitchell, S. C. Potter, M. Punta, M. Qureshi, A. Sangrador-Vegas, G. A. Salazar, J. Tate, A. Bateman, The Pfam protein families database: towards a more sustainable future. *Nucleic. Acids Res.* **44**, D279-285 (2016).
10. Y. J. Kang., D. C. Yang, L. Kong 1, M. Hou, Y. Q. Meng, L. Wei, G. Gao, CPC2: a fast and accurate coding potential calculator based on sequence intrinsic features. *Nucleic. Acids Res.* **45**, W12-W16 (2017).
11. S. E. Lewis, S. M. Searle, N. Harris, M. Gibson, V. Lyer, J. Richter, C. Wiel, L. Bayraktaroglu, E. Birney, M. A. Crosby, J. S. Kaminker, B. B. Matthews, S. E. Prochnik, C. D. Smithy, J. L. Tupy, G. M. Rubin, S. Misra, C. J. Mungall, M. E. Clamp, Apollo: a sequence annotation editor. *Genome Biol.* **3**, RESEARCH0082 (2002).
12. M. I. Love, W. Huber, S. Anders, Moderated estimation of fold change and dispersion for RNA-seq data with DESeq2. *Genome Biol.* **15**, 550 (2014).
13. P. Langfelder, S. Horvath, WGCNA: an R package for weighted correlation network analysis. *BMC Bioinformatics* **9**, 559 (2008).
14. J. S. Ramsey, A. C. Wilson, M. de Vos, Q. Sun, C. Tamborindeguy, A. Winfield, G. Malloch, D. M. Smith, B. Fenton, S. M. Gray, G. Jander, Genomic resources for *Myzus persicae*: EST sequencing, SNP identification, and microarray design. *BMC Genomics* **8**: 423 (2007).
15. M. D. Nelson, D. H. Fitch, Overlap extension PCR: an efficient method for transgene construction. *Methods Mol. Biol.* **772**, 459-470 (2011).
16. N. Bechtold, J. Ellis, G. Pelletier, In planta *Agrobacterium*-mediated gene transfer by infiltration of adult *Arabidopsis thaliana* plants. *C. R. Acad. Sci. Ser. III Sci. Vie. Life Sci.* **316**, 1194–1199 (1993).
17. T. D. Schmittgen, K. J. Livak, Analyzing real-time PCR data by the comparative C(T) method. *Nat. Protoc.* **3**, 1101-1108 (2008).
18. F. Supek, M. Bosnjak, N. Skunca, T. Smuc, REVIGO summarizes and visualizes long lists of gene ontology terms. *PLoS One* **6**, e21800 (2011).

19. K. Katoh, D. M. Standley, MAFFT multiple sequence alignment software version 7: improvements in performance and usability. *Mol. Biol. Evol.* **30**, 772-780 (2013).
20. I. Sela, H. Ashkenazy, K. Katoh, T. Pupko, GUIDANCE2: accurate detection of unreliable alignment regions accounting for the uncertainty of multiple parameters. *Nucleic. Acids Res.* **43**, W7-14 (2015).
